# Supplementary material for: Historical Global Review of Acid-Volatile Sulfide Sediment Monitoring Data
Source: MDPI journal article supplement (doi:10.3390/soilsystems6030071), 2022-09-17
Supplement: s1 [file s1]

**Table S1. Hall & Anderson (2022) Supplemental Sediment AVS Data**

| Waterbody Type   | Study               | Region           | Sites     | Sub-sites | AVS umole/g | Means |
|------------------|---------------------|------------------|-----------|-----------|-------------|-------|
| Creeks & Streams | Ankley et al (1996) | SW Missouri, USA | TC1       | Mar       | 3.86        | 11.47 |
|                  |                     |                  | TC2       | Mar       | 9.21        |       |
|                  |                     |                  | TC3       | Mar       | 1.93        |       |
|                  |                     |                  | TC4       | Mar       | 4.17        |       |
|                  |                     |                  | TC5       | Mar       | 33.20       |       |
|                  |                     |                  | TC6       | Mar       | 16.45       |       |
|                  |                     |                  | TC1       | Jun       | 1.40        | 1.70  |
|                  |                     |                  | TC2       | Jun       | 1.03        |       |
|                  |                     |                  | TC3       | Jun       | 1.40        |       |
|                  |                     |                  | TC4       | Jun       | 2.15        |       |
|                  |                     |                  | TC5       | Jun       | 1.36        |       |
|                  |                     |                  | TC6       | Jun       | 2.85        |       |
| Creeks & Streams | Burton et al (2007) | Sweden           | ecoregion | 14        | 0.005       | 0.693 |
|                  |                     | Sweden           |           | 14        | 0.004       |       |
|                  |                     | Sweden           |           | 14        | 2.071       |       |
|                  |                     | Denmark          | ecoregion | 14        | 0.671       | 0.739 |
|                  |                     | Denmark          |           | 14        | 1.687       |       |
|                  |                     | Denmark          |           | 14        | 0.310       |       |
|                  |                     | Denmark          |           | 14        | 0.058       |       |
|                  |                     | Denmark          |           | 14        | 1.326       |       |
|                  |                     | Denmark          |           | 14        | 0.381       |       |
|                  |                     | England/Wales    | ecoregion | 18        | 7.580       | 4.378 |
|                  |                     | England/Wales    |           | 18        | 0.121       |       |
|                  |                     | England/Wales    |           | 18        | 0.387       |       |
|                  |                     | England/Wales    |           | 18        | 0.555       |       |
|                  |                     | England/Wales    |           | 18        | 4.055       |       |
|                  |                     | England/Wales    |           | 18        | 1.513       |       |
|                  |                     | England/Wales    |           | 18        | 2.729       |       |
|                  |                     | England/Wales    |           | 18        | 5.614       |       |
|                  |                     | England/Wales    |           | 18        | 0.074       |       |
|                  |                     | England/Wales    |           | 18        | 0.007       |       |
|                  |                     | England/Wales    |           | 18        | 0.019       |       |
|                  |                     | England/Wales    |           | 18        | 2.461       |       |
|                  |                     | England/Wales    |           | 18        | 4.585       |       |
|                  |                     | England/Wales    |           | 18        | 5.958       |       |
|                  |                     | England/Wales    |           | 18        | 2.879       |       |
|                  |                     | England/Wales    |           | 18        | 31.503      |       |
|                  |                     | Finland          | ecoregion | 22        | 1.422       | 0.928 |
|                  |                     | Finland          |           | 22        | 0.004       |       |

| Waterbody Type   | Study                | Region                     | Sites        | Sub-sites | AVS umole/g | Means |
|------------------|----------------------|----------------------------|--------------|-----------|-------------|-------|
|                  |                      | Finland                    | ecoregion    | 22        | 0.004       |       |
|                  |                      | Finland                    |              | 22        | 0.028       |       |
|                  |                      | Finland                    |              | 22        | 3.182       |       |
|                  |                      | Belgium                    |              | 8         | 43.980      | 8.232 |
|                  |                      | Belgium                    |              | 9         | 0.020       |       |
|                  |                      | Belgium                    |              | 9         | 0.627       |       |
|                  |                      | Belgium                    |              | 9         | 0.087       |       |
|                  |                      | Belgium                    |              | 13        | 3.493       |       |
|                  |                      | Belgium                    |              | 13        | 1.185       |       |
|                  |                      | France                     |              | 8         | 25.265      | 5.214 |
|                  |                      | France                     |              | 8         | 0.004       |       |
|                  |                      | France                     |              | 8         | 1.104       |       |
|                  |                      | France                     |              | 8         | 2.093       |       |
|                  |                      | France                     |              | 13        | 4.148       |       |
|                  |                      | France                     |              | 13        | 23.206      |       |
|                  |                      | France                     |              | 13        | 1.416       |       |
|                  |                      | France                     |              | 13        | 0.749       |       |
|                  |                      | France                     |              | 13        | 0.099       |       |
|                  |                      | France                     |              | 13        | 0.158       |       |
|                  |                      | France                     |              | 13        | 4.304       |       |
|                  |                      | France                     |              | 13        | 0.022       |       |
|                  |                      | Germany                    |              | 9         | 0.007       | 0.795 |
|                  |                      | Germany                    |              | 9         | 0.777       |       |
|                  |                      | Germany                    |              | 9         | 0.571       |       |
|                  |                      | Germany                    |              | 9         | 0.026       |       |
|                  |                      | Germany                    |              | 9         | 0.459       |       |
|                  |                      | Germany                    |              | 9         | 0.029       |       |
|                  |                      | Germany                    |              | 9         | 0.126       |       |
|                  |                      | Germany                    |              | 14        | 0.080       |       |
|                  |                      | Germany                    |              | 14        | 5.084       |       |
|                  |                      | Italy                      |              | 3         | 0.008       | 0.010 |
|                  |                      | Italy                      |              | 3         | 0.012       |       |
| Creeks & Streams | Carlson et al (1991) | E Wisconsin, USA           | East River   |           | 8.8         | 8.8   |
| Creeks & Streams | Cervi et al 2021     | S Michigan, USA            | River Raisin |           | 1.12        | 1.12  |
| Creeks & Streams | Hall et al (2009)    | Pittsburg, California, USA | KC1          | 2006      | 3.579       | 5.341 |
|                  |                      |                            | KC1          | 2007      | 19.114      |       |
|                  |                      |                            | KC2          | 2006      | 0.855       |       |
|                  |                      |                            | KC2          | 2007      | 2.869       |       |
|                  |                      |                            | KC3          | 2006      | 0.273       |       |
|                  |                      |                            | KC3          | 2007      | 20.081      |       |
|                  |                      |                            | KC4          | 2006      | 6.810       |       |
|                  |                      |                            | KC4          | 2007      | 5.893       |       |

| Waterbody Type   | Study             | Region                      | Sites           | Sub-sites | AVS umole/g | Means |
|------------------|-------------------|-----------------------------|-----------------|-----------|-------------|-------|
| Creeks & Streams | Hall et al (2013) | Sacramento, California, USA | KC5             | 2006      | 4.189       | 0.751 |
|                  |                   |                             | KC5             | 2007      | 1.964       |       |
|                  |                   |                             | KC6             | 2006      | 1.316       |       |
|                  |                   |                             | KC6             | 2007      | 0.904       |       |
|                  |                   |                             | KC7             | 2006      | 0.217       |       |
|                  |                   |                             | KC7             | 2007      | 22.919      |       |
|                  |                   |                             | KC8             | 2006      | 0.150       |       |
|                  |                   |                             | KC8             | 2007      | 5.426       |       |
|                  |                   |                             | KC9             | 2006      | 0.455       |       |
|                  |                   |                             | KC9             | 2007      | 2.495       |       |
|                  |                   |                             | KC10            | 2006      | 0.264       |       |
|                  |                   |                             | KC10            | 2007      | 6.642       |       |
|                  |                   |                             | KC11            | 2006      | 0.203       |       |
|                  |                   |                             | KC11            | 2007      | 0.187       |       |
|                  |                   |                             | KC12            | 2006      | 0.250       |       |
|                  |                   |                             | KC12            | 2007      | 9.957       |       |
|                  |                   |                             | KC13            | 2006      | 0.071       |       |
|                  |                   |                             | KC13            | 2007      | 8.295       |       |
|                  |                   |                             | KC14            | 2006      | 0.506       |       |
|                  |                   |                             | KC14            | 2007      | 23.671      |       |
| Creeks & Streams | Hall et al (2013) | Salinas, California, USA    | Arcade Creek    | ARC 1a    | 3.916       | 0.751 |
|                  |                   |                             |                 | ARC 1     | 3.311       |       |
|                  |                   |                             |                 | ARC 2     | 0.016       |       |
|                  |                   |                             |                 | ARC 3     | 0.014       |       |
|                  |                   |                             |                 | ARC 4     | 0.014       |       |
|                  |                   |                             |                 | ARC 5     | 0.027       |       |
|                  |                   |                             |                 | ARC 6     | 0.848       |       |
|                  |                   |                             |                 | ARC 7     | 0.012       |       |
|                  |                   |                             |                 | ARC 8     | 0.017       |       |
|                  |                   |                             |                 | ARC 9     | 0.021       |       |
|                  |                   |                             |                 | ARC 10    | 0.061       |       |
|                  |                   | Salinas, California, USA    | Salinas streams | ALS 2     | 0.398       | 0.781 |
|                  |                   |                             |                 | ALS 3     | 0.560       |       |
|                  |                   |                             |                 | ALS 4     | 0.740       |       |
|                  |                   |                             |                 | GAB 1     | 2.101       |       |
|                  |                   |                             |                 | GAB 2     | 1.268       |       |
|                  |                   |                             |                 | GAB 3     | 1.028       |       |
|                  |                   |                             |                 | GAB 4     | 1.133       |       |
|                  |                   |                             |                 | GAB 5     | 0.477       |       |
|                  |                   |                             |                 | NAT 1     | 0.986       |       |
|                  |                   |                             |                 | NAT 2     | 0.561       |       |
|                  |                   |                             |                 | NAT 3     | 0.260       |       |

| Waterbody Type   | Study             | Region                          | Sites               | Sub-sites | AVS umole/g | Means |
|------------------|-------------------|---------------------------------|---------------------|-----------|-------------|-------|
| Creeks & Streams | Hall et al (2017) | N Illinois, USA                 | Big Bureau Creek    | NAT 4     | 0.019       | 0.458 |
|                  |                   |                                 |                     | ALS 1     | 0.622       |       |
|                  |                   |                                 |                     | BC 1      | 0.647       |       |
|                  |                   |                                 |                     | BC 2      | 0.420       |       |
|                  |                   |                                 |                     | BC 3      | 0.244       |       |
|                  |                   |                                 |                     | BC 4      | 0.246       |       |
|                  |                   |                                 |                     | BC 5      | 0.359       |       |
|                  |                   |                                 |                     | BC 6      | 0.513       |       |
|                  |                   |                                 |                     | BC 7      | 1.192       |       |
|                  |                   |                                 |                     | BC 8      | 0.398       |       |
|                  |                   |                                 |                     | BC 9      | 0.300       |       |
|                  |                   |                                 |                     | BC 10     | 0.465       |       |
|                  |                   |                                 |                     | BC 11     | 0.481       |       |
|                  |                   |                                 |                     | BC 12     | 0.230       |       |
| Creeks & Streams | Hall et al (2018) | Santa Maria, California, USA    | Santa Maria streams | SM 1      | 9.22        | 5.91  |
|                  |                   |                                 |                     | SM 2      | 1.07        |       |
|                  |                   |                                 |                     | SM 3      | 1.28        |       |
|                  |                   |                                 |                     | SM 4      | 0.26        |       |
|                  |                   |                                 |                     | SM 5      | 5.43        |       |
|                  |                   |                                 |                     | SM 6      | 0.89        |       |
|                  |                   |                                 |                     | SM 7      | 21.82       |       |
|                  |                   |                                 |                     | SM 8      | 25.81       |       |
|                  |                   |                                 |                     | SM 9      | 3.00        |       |
|                  |                   |                                 |                     | SM 10     | 0.29        |       |
|                  |                   |                                 |                     | SM 11     | 1.76        |       |
|                  |                   |                                 |                     | SM 12     | 0.07        |       |
| Creeks & Streams | Hall et al (2021) | Pleasant Grove, California, USA | Urban               | PGC 1     | 12.35       | 2.78  |
|                  |                   |                                 |                     | PGC 2     | 0.28        |       |
|                  |                   |                                 |                     | PGC 3     | 4.27        |       |
|                  |                   |                                 |                     | PGC 4     | 0.30        |       |
|                  |                   |                                 |                     | PGC 8     | 4.04        |       |
|                  |                   |                                 |                     | PGC 9     | 1.13        |       |
|                  |                   |                                 |                     | PGC 10    | 0.69        |       |
|                  |                   |                                 |                     | PGC 11    | 2.57        |       |
|                  |                   |                                 |                     | PGC 12    | 1.90        |       |
|                  |                   |                                 |                     | PGC 14    | 1.58        |       |
|                  |                   |                                 |                     | PGC 15    | 1.21        |       |
|                  |                   |                                 |                     | PGC 16    | 1.31        |       |
|                  |                   |                                 |                     | PGC 17    | 3.16        |       |
|                  |                   |                                 |                     | PGC 18    | 3.65        |       |
|                  |                   |                                 |                     | PGC 19    | 0.62        |       |
|                  |                   |                                 |                     | PGC 20    | 6.70        |       |

| Waterbody Type   | Study                     | Region                  | Sites                  | Sub-sites           | AVS umole/g | Means |
|------------------|---------------------------|-------------------------|------------------------|---------------------|-------------|-------|
|                  |                           |                         | Agr                    | PGC 21              | 2.20        | 4.65  |
|                  |                           |                         |                        | PGC 22              | 2.07        |       |
|                  |                           |                         |                        | PGC 5               | 3.08        |       |
|                  |                           |                         |                        | PGC 6               | 5.19        |       |
|                  |                           |                         |                        | PGC 7               | 5.68        |       |
| Creeks & Streams | Poot et al (2009)         | SE Netherlands          | Beekloop               | Liskesbrug 1        | 62.6        | 39.8  |
|                  |                           |                         |                        | Liskesbrug 2        | 49          |       |
|                  |                           |                         |                        | Liskesbrug 3        | 34.5        |       |
|                  |                           |                         |                        | Liskesbrug 4        | 13.1        |       |
| Creeks & Streams | Van Den Hoop et al (1997) | N Netherlands           |                        | Waterwijk Creek     | 3.636       | 2.892 |
|                  |                           |                         |                        | Waterwijk Creek     | 0.811       |       |
|                  |                           |                         |                        | Waterwijk Creek     | 1.301       |       |
|                  |                           |                         |                        | Waterwijk Creek     | 1.874       |       |
|                  |                           |                         |                        | Waterwijk Creek     | 0.825       |       |
|                  |                           |                         |                        | Waterwijk Creek     | 1.762       |       |
|                  |                           |                         |                        | Waterwijk Creek     | 0.657       |       |
|                  |                           |                         |                        | Waterwijk Creek     | 7.455       |       |
|                  |                           |                         |                        | Waterwijk Creek     | 4.895       |       |
|                  |                           |                         |                        | Waterwijk Creek     | 1.916       |       |
|                  |                           |                         |                        | Waterwijk Creek     | 7.636       |       |
| Rivers/Canals    | Besser et al (1995)       | W Montana, USA          |                        | Rick Cr. (RC)       | 1.9         | 1.9   |
|                  |                           |                         |                        | Silverbow Cr. (CF1) | 2.9         | 8.8   |
|                  |                           |                         |                        | Galen (CF2)         | 0.5         |       |
|                  |                           |                         |                        | Deer Lodge (CF3)    | 7.5         |       |
|                  |                           |                         |                        | Gold Cr. (CF4)      | 22.0        |       |
|                  |                           |                         |                        | Bearmouth (CFS)     | 11.0        |       |
| Rivers/Canals    | Brumbaugh et al (1994)    | W Montana, USA          | reference trib         | CF 06 (ref)         | 6.7         | 6.7   |
|                  |                           |                         | Upper Clark Fork River | CF 01               | 0.3         | 9.1   |
|                  |                           |                         |                        | Cf 02               | 19.1        |       |
|                  |                           |                         |                        | CF 03               | 5.2         |       |
|                  |                           |                         |                        | CF 04               | 13          |       |
|                  |                           |                         |                        | CF 05               | 7.8         |       |
| Rivers/Canals    | De Jong et al (2009)      | N Belgium, E of Antwerp | Lowland riverine       | 1                   | 34.9        | 76.31 |
|                  |                           |                         |                        | 2                   | 90.8        |       |
|                  |                           |                         |                        | 3                   | 197         |       |
|                  |                           |                         |                        | 4                   | 183         |       |
|                  |                           |                         |                        | 5                   | 159         |       |
|                  |                           |                         |                        | 6                   | 112         |       |
|                  |                           |                         |                        | 7                   | 8.19        |       |
|                  |                           |                         |                        | 8                   | 0.763       |       |
|                  |                           |                         |                        | 9                   | 25.6        |       |

| Waterbody Type | Study                            | Region                     | Sites            | Sub-sites      | AVS umole/g | Means  |
|----------------|----------------------------------|----------------------------|------------------|----------------|-------------|--------|
|                |                                  |                            |                  | 10             | 5.62        |        |
|                |                                  |                            |                  | 11             | 85.7        |        |
|                |                                  |                            |                  | 12             | 44.7        |        |
|                |                                  |                            |                  | 13             | 50.4        |        |
|                |                                  |                            |                  | 14             | 1.51        |        |
|                |                                  |                            |                  | 15             | 86.7        |        |
|                |                                  |                            |                  | 16             | 205         |        |
| Rivers/Canals  | De Jong et al (2010)             | N Belgium, Flanders Region | Lowland riverine | 17             | 6.47        | 28.279 |
|                |                                  |                            |                  | 1              | 0.045       |        |
|                |                                  |                            |                  | 2              | 2.09        |        |
|                |                                  |                            |                  | 3              | 4.01        |        |
|                |                                  |                            |                  | 4              | 1.22        |        |
|                |                                  |                            |                  | 5              | 1.18        |        |
|                |                                  |                            |                  | 6              | 0.292       |        |
|                |                                  |                            |                  | 7              | 0.054       |        |
|                |                                  |                            |                  | 8              | 1.65        |        |
|                |                                  |                            |                  | 9              | 6.59        |        |
|                |                                  |                            |                  | 10             | 0.556       |        |
|                |                                  |                            |                  | 11             | 0.013       |        |
|                |                                  |                            |                  | 12             | 0.197       |        |
|                |                                  |                            |                  | 13             | 120         |        |
|                |                                  |                            |                  | 14             | 0.024       |        |
|                |                                  |                            |                  | 15             | 29.5        |        |
|                |                                  |                            |                  | 16             | 1.85        |        |
|                |                                  |                            |                  | 17             | 2.42        |        |
|                |                                  |                            |                  | 18             | 7.96        |        |
|                |                                  |                            |                  | 19             | 0.047       |        |
|                |                                  |                            |                  | 20             | 4.10        |        |
|                |                                  |                            |                  | 21             | 10.4        |        |
|                |                                  |                            |                  | 22             | 0.204       |        |
|                |                                  |                            |                  | 23             | 226         |        |
|                |                                  |                            |                  | 24             | 14.3        |        |
|                |                                  |                            |                  | 25             | 357         |        |
|                |                                  |                            |                  | 26             | 0.004       |        |
|                |                                  |                            |                  | 27             | 0.063       |        |
|                |                                  |                            |                  | 28             | 0.045       |        |
| Rivers/Canals  | European Copper Institute (2008) | Flanders Region, N Belgium | Dender           | Aalst          | 6.55        | 31.79  |
|                |                                  |                            | Dender           | Aalst          | 3.33        |        |
|                |                                  |                            | Dender           | Aalst          | 12.2        |        |
|                |                                  |                            | Dender           | Dendermonde    | 22.6        |        |
|                |                                  |                            | Dender           | Geraardsbergen | 25.7        |        |
|                |                                  |                            | Dender           | Geraardsbergen | 7.03        |        |

| Waterbody Type | Study             | Region                    | Sites               | Sub-sites        | AVS umole/g | Means |
|----------------|-------------------|---------------------------|---------------------|------------------|-------------|-------|
| Rivers/Canals  | Hall et al (2015) | Rio Vista California, USA | Dender              | Geraardsbergen   | 12          | 1.13  |
|                |                   |                           | Dender              | Geraardsbergen   | 16          |       |
|                |                   |                           | IJzer               | Alveringem       | 15.7        |       |
|                |                   |                           | IJzer               | Alveringem       | 32.89       |       |
|                |                   |                           | IJzer               | Diksmuide        | 121.72      |       |
|                |                   |                           | IJzer               | Diksmuide        | 52.71       |       |
|                |                   |                           | IJzer               | Diksmuide        | 20.42       |       |
|                |                   |                           | IJzer               | Diksmuide        | 14.79       |       |
|                |                   |                           | IJzer               | Diksmuide        | 8.78        |       |
|                |                   |                           | IJzer               | Diksmuide        | 13.5        |       |
|                |                   |                           | IJzer               | Diksmuide        | 99.72       |       |
|                |                   |                           | IJzer               | Diksmuide        | 17.89       |       |
|                |                   |                           | IJzer               | Lo-Reninge       | 44.41       |       |
|                |                   |                           | IJzer               | Lo-Reninge       | 23.33       |       |
|                |                   |                           | IJzer               | Lo-Reninge       | 103.85      |       |
|                |                   |                           | IJzer               | Lo-Reninge       | 48.83       |       |
|                |                   |                           | IJzer               | Lo-Reninge       | 91.94       |       |
|                |                   |                           | IJzer               | Lo-Reninge       | 25.56       |       |
|                |                   |                           | IJzer               | Nieuwpoort       | 10.74       |       |
|                |                   |                           | IJzer               | Nieuwpoort       | 105.99      |       |
|                |                   |                           | IJzer               | Roesbrugge       | 14.26       |       |
|                |                   |                           | IJzer               | Roesbrugge       | 13.79       |       |
|                |                   |                           | IJzer               | Vleteren         | 30.3        |       |
|                |                   |                           | IJzer               | Poperinge        | 24.5        |       |
|                |                   |                           | Leie                | Kortrijk         | 33.6        |       |
|                |                   |                           | Leie                | St Martens Latem | 132         |       |
|                |                   |                           | Schelde             | Hemiksem         | 3.47        |       |
|                |                   |                           | Schelde             | Temse            | 2.28        |       |
|                |                   |                           | Schelde (Ringvaart) | Avelgem          | 32.8        |       |
|                |                   |                           | Schelde (Ringvaart) | Berlare          | 2.78        |       |
|                |                   |                           | Schelde (Ringvaart) | Dendermonde      | 30.3        |       |
|                |                   |                           | Schelde (Ringvaart) | Gent             | 18.6        |       |
|                |                   |                           | Schelde (Ringvaart) | Kluisbergen      | 3.1         |       |
|                |                   |                           | Schelde (Ringvaart) | Melle            | 9.4         |       |
|                |                   |                           | Schelde (Ringvaart) | Oudenaarde       | 24.8        |       |
|                |                   |                           | Schelde (Ringvaart) | Pecq             | 7.06        |       |
|                |                   |                           | Schelde (Ringvaart) | Zeie             | 6.94        |       |
|                |                   |                           | Schelde (Ringvaart) | Zingem           | 50.7        |       |
|                |                   |                           | Cache Slough        | CS-1             | 0.40        |       |
|                |                   |                           |                     | CS-2             | 0.72        |       |
|                |                   |                           |                     | CS-3             | 1.06        |       |
|                |                   |                           |                     | CS-4             | 0.46        |       |

| Waterbody Type | Study                          | Region                | Sites                | Sub-sites                   | AVS umole/g | Means  |
|----------------|--------------------------------|-----------------------|----------------------|-----------------------------|-------------|--------|
|                |                                |                       |                      | CS-5                        | 1.63        |        |
|                |                                |                       |                      | CS-6                        | 0.68        |        |
|                |                                |                       |                      | CS-7                        | 0.58        |        |
|                |                                |                       |                      | CS-8                        | 1.07        |        |
|                |                                |                       |                      | CS-9                        | 1.89        |        |
|                |                                |                       |                      | CS-10                       | 1.85        |        |
|                |                                |                       |                      | CS-11                       | 2.14        |        |
|                |                                |                       |                      | CS-12                       | 1.05        |        |
| Rivers/Canals  | Mendez-Fernandeza et al (2014) | N Belgium             | Nete/Scheldt Basins  | SN                          | 244.20      | 196.80 |
|                |                                |                       |                      | KN                          | 24.90       |        |
|                |                                |                       |                      | MN                          | 321.30      |        |
| Rivers/Canals  | Naylor et al (2006)            | S Netherlands         | Meuse & Rhine Rivers | 0                           | 7.06        | 5.01   |
|                |                                |                       |                      | 1                           | 5.47        |        |
|                |                                |                       |                      | 2                           | 5.39        |        |
|                |                                |                       |                      | 3                           | 6.57        |        |
|                |                                |                       |                      | 4                           | 5.58        |        |
|                |                                |                       |                      | 5                           | 6.58        |        |
|                |                                |                       |                      | 6                           | 5.13        |        |
|                |                                |                       |                      | 7                           | 4.18        |        |
|                |                                |                       |                      | 8                           | 2.60        |        |
| Rivers/Canals  | Patton & Crecelius (2001)      | Washington State, USA | Hanford Reach        | 9                           | 1.49        | 4.683  |
|                |                                |                       |                      | White Bluffs Slough         | 9.030       |        |
|                |                                |                       |                      | 100-F Area Slough           | 1.180       |        |
|                |                                |                       |                      | Old Hanford Townsite Slough | 12.600      |        |
|                |                                |                       |                      | Richland Pumphouse          | 2.690       |        |
|                |                                |                       |                      | 100-F Area Slough           | 0.320       |        |
|                |                                |                       |                      | Old Hanford Townsite Slough | 2.200       |        |
|                |                                |                       |                      | Richland Pumphouse          | 6.610       |        |
|                |                                |                       |                      | White Bluffs Slough         | 2.250       |        |
|                |                                |                       |                      | Old Hanford Townsite Slough | 5.270       |        |
| Rivers/Canals  | Prica et al (2008)             | N Serbia              | Spr                  | Richland Pumphouse          | NS          | 8.43   |
|                |                                |                       |                      | Begej-1                     | 4.3         |        |
|                |                                |                       |                      | Begej-2                     | 7.1         |        |
|                |                                |                       |                      | Begej-3                     | 6.8         |        |
|                |                                |                       |                      | Tisa-1                      | 14.13       |        |
|                |                                |                       |                      | Tamis-1                     | 13.85       |        |
|                |                                |                       |                      | Tamis-2                     | 13.57       |        |
|                |                                |                       |                      | Danube-1                    | 11.21       |        |
|                |                                |                       |                      | Danube-2                    | 10.20       |        |
|                |                                |                       |                      | Nadela                      | 4.8         |        |
|                |                                |                       |                      | Kudos                       | 4.31        |        |
|                |                                |                       |                      | DTD-Canal                   | 3.1         |        |

| Waterbody Type         | Study                     | Region                | Sites           | Sub-sites    | AVS umole/g | Means  |
|------------------------|---------------------------|-----------------------|-----------------|--------------|-------------|--------|
| Rivers/Canals          | Van Den Berg et al (1998) | SW Netherlands        | Nov-95          | Sava-Sabac   | 7.75        | 9.0    |
|                        |                           |                       |                 | Begej-1      | 4.5         |        |
|                        |                           |                       |                 | Begej-2      | 7.4         |        |
|                        |                           |                       |                 | Begej-3      | 7.1         |        |
|                        |                           |                       |                 | Tisa-1       | 15.97       |        |
|                        |                           |                       |                 | Tamis-1      | 14.82       |        |
|                        |                           |                       |                 | Tamis-2      | 14.79       |        |
|                        |                           |                       |                 | Danube-1     | 12.89       |        |
|                        |                           |                       |                 | Nadela       | 4.99        |        |
|                        |                           |                       |                 | Kudos        | 4.63        |        |
|                        |                           |                       |                 | DTD-Canal    | 3.19        |        |
|                        |                           |                       |                 | Sava-Sabac   | 8.68        |        |
|                        |                           |                       | Jun-96          | A            | 18.0        | 21.9   |
|                        |                           |                       |                 | A            | 17.9        |        |
|                        |                           |                       |                 | B            | 51.7        |        |
|                        |                           |                       |                 | B            | 52.5        |        |
|                        |                           |                       |                 | C            | 7.4         |        |
|                        |                           |                       |                 | C            | 8.8         |        |
|                        |                           |                       |                 | D            | 8.3         |        |
|                        |                           |                       |                 | D            | 10.3        |        |
| Rivers/Canals          | Van Den Hoop et al (1997) | Netherlands           |                 | A            | 9.5         | 13.6   |
|                        |                           |                       |                 | B            | 28.6        |        |
|                        |                           |                       |                 | C            | 9.1         |        |
|                        |                           |                       |                 | D            | 7.2         |        |
|                        |                           |                       |                 | Kromme River | 6.873       | 14.172 |
|                        |                           |                       |                 |              | 23.155      |        |
|                        |                           |                       |                 |              | 20.113      |        |
|                        |                           |                       |                 |              | 38.423      |        |
|                        |                           |                       |                 |              | 14.141      |        |
|                        |                           |                       |                 |              | 15.099      |        |
|                        |                           |                       |                 |              | 22.141      |        |
| Ponds/Lakes/Reservoirs | Ankley et al (1993)       | Washington State, USA | Steilacoom Lake |              | 33.521      |        |
|                        |                           |                       |                 |              | 14.761      |        |
|                        |                           |                       |                 |              | 26.986      |        |
|                        |                           |                       |                 |              | 13.296      |        |
|                        |                           |                       |                 |              | 16.169      |        |
|                        |                           |                       |                 | SL1          | 4.01        | 1.97   |
|                        |                           |                       |                 | SL2          | 2.89        |        |
|                        |                           |                       |                 | SL3          | 0.30        |        |
|                        |                           |                       |                 | SL4          | 1.94        |        |
|                        |                           |                       |                 | SL5          | 2.06        |        |
|                        |                           |                       |                 | SL6          | 4.16        |        |

| Waterbody Type         | Study               | Region            | Sites              | Sub-sites          | AVS umole/g | Means |
|------------------------|---------------------|-------------------|--------------------|--------------------|-------------|-------|
| Ponds/Lakes/Reservoirs | Allen et al (1993)  | NE Minnesota, USA |                    | SL7                | 1.48        |       |
|                        |                     |                   |                    | SL8                | 1.60        |       |
|                        |                     |                   |                    | SL9                | 0.39        |       |
|                        |                     |                   |                    | SL10               | 2.17        |       |
|                        |                     |                   |                    | SL11               | 0.65        |       |
|                        |                     |                   |                    | Fish Lake          | 1.3         | 1.63  |
|                        |                     |                   |                    |                    | 1.68        |       |
|                        |                     |                   |                    |                    | 1.87        |       |
|                        |                     |                   |                    |                    | 1.65        |       |
|                        |                     |                   |                    | Pike Lake          | 16.6        | 16.63 |
|                        |                     |                   |                    |                    | 16.51       |       |
|                        |                     |                   |                    |                    | 16.74       |       |
|                        |                     |                   |                    |                    | 16.65       |       |
|                        |                     |                   |                    | Caribou L          | 8.4         | 6.40  |
|                        |                     |                   |                    |                    | 5.46        |       |
|                        |                     |                   |                    |                    | 5.35        |       |
| Ponds/Lakes/Reservoirs | Besser et al (1995) | W Montana, USA    | Milltown Reservoir | MR-Upper (MRI 9)   | 7.5         | 18.5  |
|                        |                     |                   |                    | MR-Middle (MR7)    | 15.0        |       |
|                        |                     |                   |                    | MR-Lower (MR2)     | 19.0        |       |
|                        |                     |                   |                    | MR-North (MRI0)    | 0.2         |       |
|                        |                     |                   |                    | MR-Central (MRI 1) | 22.0        |       |
|                        |                     |                   |                    | MR-South (MR25)    | 47.0        |       |
|                        |                     | Michigan, USA     | Upper Peninsula    | Carp Lk. (CL)      | 5.7         | 10.2  |
|                        |                     |                   |                    | Dollar Bay (DB)    | 0.2         |       |
|                        |                     |                   |                    | Deer Lk. (DL)      | 65.0        |       |
|                        |                     |                   |                    | Gratiot Lk. (GL)   | 7.8         |       |
|                        |                     |                   |                    | Hancock Hbr. (HH)  | 1.3         |       |
|                        |                     |                   |                    | Lac LaBelle (LL)   | 0.4         |       |
|                        |                     |                   |                    | Round Lk. (RL)     | 0.9         |       |
|                        |                     |                   |                    | Torch Lk. (TL)     | 0.1         |       |
|                        |                     | W Michigan, USA   | Lower Peninsula    | Ford Lk. (FL)      | 35.0        | 127.1 |
|                        |                     |                   |                    | Houghton Lk. (HL)  | 43.0        |       |
|                        |                     |                   |                    | Jordan Lk. (JL)    | 55.0        |       |
|                        |                     |                   |                    | Lk. Orion (LO)     | 471.0       |       |
|                        |                     |                   |                    | Lk. Mitchell (MI)  | 14.0        |       |
|                        |                     |                   |                    | Mona Lk. (MO)      | 336.0       |       |
|                        |                     |                   |                    | Monterey Lk. (MT)  | 40.0        |       |
|                        |                     |                   |                    | White Lk. (WL)     | 23.0        |       |
|                        |                     |                   |                    | MR 01 (ref)        | 0.6         | 9.4   |
|                        |                     |                   |                    | MR 02              | 15.6        |       |
|                        |                     |                   |                    | MR07               | 9.8         |       |
|                        |                     |                   |                    | MR 11              | 2.5         |       |

| Waterbody Type         | Study                   | Region            | Sites                             | Sub-sites          | AVS umole/g | Means |
|------------------------|-------------------------|-------------------|-----------------------------------|--------------------|-------------|-------|
|                        |                         |                   |                                   | MR 17              | 23.3        |       |
|                        |                         |                   |                                   | MR 19              | 1.5         |       |
|                        |                         |                   |                                   | MR 25              | 12.6        |       |
| Ponds/Lakes/Reservoirs | Carlson et al (1991)    | NE Minnesota, USA |                                   | Pequaywan Lake     | 42          | 22.8  |
|                        |                         |                   |                                   | West Bearskin Lake | 3.6         |       |
| Ponds/Lakes/Reservoirs | Cervi et al 2021        | S Michigan, USA   |                                   | Maple Lake         | 1.18        | 1.18  |
| Ponds/Lakes/Reservoirs | Herta-Diaz et al (1993) | S Ontario, Canada | Lake Tock<br>(~core depth)        | 0.5                | 0.187       | 1.745 |
|                        |                         |                   |                                   | 1.5                | 0.602       |       |
|                        |                         |                   |                                   | 2.5                | 0.685       |       |
|                        |                         |                   |                                   | 3.5                | 2.220       |       |
|                        |                         |                   |                                   | 4.5                | 1.691       |       |
|                        |                         |                   |                                   | 5.5                | 12.552      |       |
|                        |                         |                   |                                   | 6.5                | 0.560       |       |
|                        |                         |                   |                                   | 7.5                | 0.954       |       |
|                        |                         |                   |                                   | 8.5                | 0.560       |       |
|                        |                         |                   |                                   | 9.5                | 0.851       |       |
|                        |                         |                   |                                   | 12.5               | 0.062       |       |
|                        |                         |                   |                                   | 15.5               | 0.021       |       |
|                        |                         |                   | Lake Little Wren<br>(~core depth) | 0.5                | 0.310       | 0.787 |
|                        |                         |                   |                                   | 1.5                | 1.952       |       |
|                        |                         |                   |                                   | 2.5                | 2.469       |       |
|                        |                         |                   |                                   | 3.5                | 1.818       |       |
|                        |                         |                   |                                   | 4.5                | 1.085       |       |
|                        |                         |                   |                                   | 5.5                | 0.465       |       |
|                        |                         |                   |                                   | 6.5                | 0.248       |       |
|                        |                         |                   |                                   | 7.5                | 0.351       |       |
|                        |                         |                   |                                   | 8.5                | 0.207       |       |
|                        |                         |                   |                                   | 9.5                | 0.165       |       |
|                        |                         |                   |                                   | 12.5               | 0.165       |       |
|                        |                         |                   |                                   | 15.5               | 0.207       |       |
| Ponds/Lakes/Reservoirs | Leonard et al (1993)    | NE Minnesota, USA | Caribou Lake                      | 1                  | 2.0         | 3.8   |
|                        |                         |                   |                                   | 2                  | 9.8         |       |
|                        |                         |                   |                                   | 3                  | 8.4         |       |
|                        |                         |                   |                                   | 4                  | 7.9         |       |
|                        |                         |                   |                                   | 5                  | 1.5         |       |
|                        |                         |                   |                                   | 6                  | -           |       |
|                        |                         |                   |                                   | 7                  | 0.8         |       |
|                        |                         |                   |                                   | 8                  | 0.5         |       |
|                        |                         |                   |                                   | 9                  | 0.1         |       |
|                        |                         |                   |                                   | 10                 | 0.1         |       |
|                        |                         |                   |                                   | 11                 | 6.6         |       |
|                        |                         |                   |                                   | 12                 | 8.6         |       |

| Waterbody Type         | Study                 | Region            | Sites               | Sub-sites | AVS umole/g | Means |
|------------------------|-----------------------|-------------------|---------------------|-----------|-------------|-------|
| Ponds/Lakes/Reservoirs | Matisoff et al (1981) | N Ohio Coast, USA | W central Lake Erie | 13        | 1.3         | 2.6   |
|                        |                       |                   |                     | 14        | 2.9         |       |
|                        |                       |                   |                     | 15        | 2.0         |       |
|                        |                       |                   |                     | 16        | 5.1         |       |
|                        |                       |                   |                     | 1         | 0.3         |       |
|                        |                       |                   |                     | 2         | 0.6         |       |
|                        |                       |                   |                     | 3         | 1.3         |       |
|                        |                       |                   |                     | 4         | 4.4         |       |
|                        |                       |                   |                     | 5         | 2.2         |       |
|                        |                       |                   |                     | 6         | -           |       |
|                        |                       |                   |                     | 7         | 2.5         |       |
|                        |                       |                   |                     | 8         | -           |       |
|                        |                       |                   |                     | 9         | 0.7         |       |
|                        |                       |                   |                     | 10        | 0.1         |       |
|                        |                       |                   |                     | 11        | 2.5         |       |
|                        |                       |                   |                     | 12        | 3.9         |       |
|                        |                       |                   |                     | 13        | 4.2         |       |
|                        |                       |                   |                     | 14        | 3.8         |       |
|                        |                       |                   |                     | 15        | 6.0         |       |
|                        |                       |                   |                     | 16        | 3.5         |       |
|                        |                       |                   |                     | 1         | 1.9         | 12.7  |
|                        |                       |                   |                     | 2         | 24.5        |       |
|                        |                       |                   |                     | 3         | 16.5        |       |
|                        |                       |                   |                     | 4         | 3.5         |       |
|                        |                       |                   |                     | 5         | 1.3         |       |
|                        |                       |                   |                     | 6         | 11.1        |       |
|                        |                       |                   |                     | 7         | 2.0         |       |
|                        |                       |                   |                     | 8         | 1.1         |       |
|                        |                       |                   |                     | 9         | 1.9         |       |
|                        |                       |                   |                     | 10        | 1.3         |       |
|                        |                       |                   |                     | 11        | 12.4        |       |
|                        |                       |                   |                     | 12        | 10.5        |       |
|                        |                       |                   |                     | 13        | 18.0        |       |
|                        |                       |                   |                     | 14        | 36.2        |       |
|                        |                       |                   |                     | 15        | 33.5        |       |
|                        |                       |                   |                     | 16        | 27.3        |       |
| Ponds/Lakes/Reservoirs | Matisoff et al (1981) | N Ohio Coast, USA | W central Lake Erie | 1         | 0.49        | 5.74  |
|                        |                       |                   |                     | 2         | 0.55        |       |
|                        |                       |                   |                     | 3         | 1.22        |       |
|                        |                       |                   |                     | 4         | 2.24        |       |
|                        |                       |                   |                     | 5         | 1.80        |       |
|                        |                       |                   |                     | 6         | 5.58        |       |

| Waterbody Type         | Study                          | Region                | Sites             | Sub-sites                    | AVS umole/g | Means |
|------------------------|--------------------------------|-----------------------|-------------------|------------------------------|-------------|-------|
|                        |                                |                       |                   | 7                            | 9.83        |       |
|                        |                                |                       |                   | 8                            | 10.17       |       |
|                        |                                |                       |                   | 9                            | 10.67       |       |
|                        |                                |                       |                   | 10                           | 14.86       |       |
| Ponds/Lakes/Reservoirs | Mendez-Fernandeza et al (2014) | NE Spain              | L pool near Alava | Con                          | 6.70        | 6.70  |
| Ponds/Lakes/Reservoirs | Patton & Crecelius (2001)      | Washington State, USA | Priest Rapids Dam | Near Grant County Shore      | 21.400      | 8.807 |
|                        |                                |                       |                   | 1/3 From Grant County Shore  | NS          |       |
|                        |                                |                       |                   | 2/3 From Grant County Shore  | 10.600      |       |
|                        |                                |                       |                   | Near Yakima County Shore     | 18.500      |       |
|                        |                                |                       |                   | Grant County Shore Near Dam  | NS          |       |
|                        |                                |                       |                   | Yakima County Shore Near Dam | NS          |       |
|                        |                                |                       |                   | Near Grant County Shore      | 15.400      |       |
|                        |                                |                       |                   | 1/3 From Grant County Shore  | 4.620       |       |
|                        |                                |                       |                   | 2/3 From Grant County Shore  | 1.730       |       |
|                        |                                |                       |                   | Near Yakima County Shore     | 7.600       |       |
|                        |                                |                       |                   | Yakima County Shore Near Dam | 3.640       |       |
|                        |                                |                       |                   | Grant County Shore Near Dam  | 9.660       |       |
|                        |                                |                       |                   | Near Grant County Shore      | 4.700       |       |
|                        |                                |                       |                   | 1/3 From Grant County Shore  | 2.440       |       |
|                        |                                |                       |                   | 2/3 From Grant County Shore  | 3.110       |       |
|                        |                                |                       |                   | Near Yakima County Shore     | 8.150       |       |
|                        |                                |                       |                   | Grant County Shore Near Dam  | 13.680      |       |
|                        |                                |                       |                   | Yakima County Shore Near Dam | 6.880       |       |
|                        |                                |                       | McNary Dam        | Near Oregon Shore            | 1.640       | 1.107 |
|                        |                                |                       |                   | 1/3 From Oregon Shore        | 2.000       |       |
|                        |                                |                       |                   | 2/3 From Oregon Shore        | 2.570       |       |
|                        |                                |                       |                   | Near Washington Shore        | 0.075       |       |
|                        |                                |                       |                   | Oregon Shore Near Dam        | NS          |       |
|                        |                                |                       |                   | Washington Shore Near Dam    | NS          |       |
|                        |                                |                       |                   | Near Oregon Shore            | 0.269       |       |
|                        |                                |                       |                   | 1/3 From Oregon Shore        | 1.580       |       |
|                        |                                |                       |                   | 2/3 From Oregon Shore        | 1.660       |       |
|                        |                                |                       |                   | Near Washington Shore        | 0.131       |       |
|                        |                                |                       |                   | Oregon Shore Near Dam        | 1.930       |       |
|                        |                                |                       |                   | Washington Shore Near Dam    | 0.144       |       |
|                        |                                |                       |                   | Near Oregon Shore            | 1.710       |       |
|                        |                                |                       |                   | 1/3 From Oregon Shore        | 3.220       |       |
|                        |                                |                       |                   | 2/3 From Oregon Shore        | 0.160       |       |
|                        |                                |                       |                   | Near Washington Shore        | 0.080       |       |
|                        |                                |                       |                   | Oregon Shore Near Dam        | 0.380       |       |
|                        |                                |                       |                   | Washington Shore Near Dam    | 0.160       |       |
|                        |                                |                       | Ice Harbor Dam    | Franklin County Shore        | NS          | 1.157 |

| Waterbody Type         | Study                     | Region            | Sites      | Sub-sites                | AVS umole/g | Means |
|------------------------|---------------------------|-------------------|------------|--------------------------|-------------|-------|
|                        |                           |                   |            | Mid River                | NS          |       |
|                        |                           |                   |            | Walla Walla County Shore | NS          |       |
|                        |                           |                   |            | Franklin County Shore    | 2.430       |       |
|                        |                           |                   |            | Mid River                | 0.033       |       |
|                        |                           |                   |            | Walla Walla County Shore | 0.697       |       |
|                        |                           |                   |            | Franklin County Shore    | 0.080       |       |
|                        |                           |                   |            | Mid River                | 1.280       |       |
|                        |                           |                   |            | Walla Walla County Shore | 2.420       |       |
|                        |                           |                   |            | West Bearskin Lake       | 3.90        |       |
| Ponds/Lakes/Reservoirs | Sibley et al (1996)       | NE Minnesota, USA |            |                          |             | 3.90  |
| Ponds/Lakes/Reservoirs | Van Den Berg et al (2001) | N Netherlands     | Lake Ketel | A                        | 0.8         | 4.7   |
|                        |                           |                   |            | A                        | 1.3         |       |
|                        |                           |                   |            | A                        | 2.3         |       |
|                        |                           |                   |            | A                        | 4.5         |       |
|                        |                           |                   |            | A                        | 8.7         |       |
|                        |                           |                   |            | A                        | 7.3         |       |
|                        |                           |                   |            | A                        | 8.7         |       |
|                        |                           |                   |            | A                        | 10.0        |       |
|                        |                           |                   |            | A                        | 14.7        |       |
|                        |                           |                   |            | A                        | 13.6        |       |
|                        |                           |                   |            | B                        | 0.8         |       |
|                        |                           |                   |            | B                        | 0.7         |       |
|                        |                           |                   |            | B                        | 1.2         |       |
|                        |                           |                   |            | B                        | 2.4         |       |
|                        |                           |                   |            | B                        | 4.5         |       |
|                        |                           |                   |            | B                        | 3.3         |       |
|                        |                           |                   |            | B                        | 4.3         |       |
|                        |                           |                   |            | B                        | 2.6         |       |
|                        |                           |                   |            | B                        | 1.9         |       |
|                        |                           |                   |            | B                        | 1.8         |       |
|                        |                           |                   |            | C                        | 1.0         |       |
|                        |                           |                   |            | C                        | 1.6         |       |
|                        |                           |                   |            | C                        | 4.2         |       |
|                        |                           |                   |            | C                        | 5.8         |       |
|                        |                           |                   |            | C                        | 5.9         |       |
|                        |                           |                   |            | C                        | 4.8         |       |
|                        |                           |                   |            | C                        | 6.2         |       |
|                        |                           |                   |            | C                        | 6.6         |       |
|                        |                           |                   |            | C                        | 8.6         |       |
|                        |                           |                   |            | C                        | 8.7         |       |
|                        |                           |                   |            | D                        | 4.2         |       |
|                        |                           |                   |            | D                        | 3.4         |       |
|                        |                           |                   |            | D                        | 2.4         |       |

| Waterbody Type         | Study                        | Region            | Sites                  | Sub-sites              | AVS umole/g | Means |
|------------------------|------------------------------|-------------------|------------------------|------------------------|-------------|-------|
|                        |                              |                   |                        | D                      | 1.7         |       |
|                        |                              |                   |                        | D                      | 1.8         |       |
|                        |                              |                   |                        | D                      | 3.0         |       |
|                        |                              |                   |                        | D                      | 6.5         |       |
|                        |                              |                   |                        | D                      | 5.2         |       |
|                        |                              |                   |                        | D                      | 4.4         |       |
|                        |                              |                   |                        | D                      | 5.0         |       |
| Ponds/Lakes/Reservoirs | Van Den Hoop et al (1997)    | Netherlands       | Freshwater Lakes       | I Schoonrewoerdse wiel | 52.00       | 25.85 |
|                        |                              |                   |                        | 6 Oostvaarders Plassen | 19.90       |       |
|                        |                              |                   |                        | 9 Ketelmeer            | 16.40       |       |
|                        |                              |                   |                        | 10 Leeghwaterplas      | 15.10       |       |
| Ponds/Lakes/Reservoirs | Van Griethuysen et al (2003) | E Netherlands     | floodplain lake        | Deest 4                | 15.3        | 15.3  |
| Ponds/Lakes/Reservoirs | Van Griethuysen et al (2006) | E Netherlands     | floodplain lake        | Deest 3                | 1.81        | 4.73  |
|                        |                              |                   |                        |                        | 2.38        |       |
|                        |                              |                   |                        |                        | 6.54        |       |
|                        |                              |                   |                        |                        | 6.77        |       |
|                        |                              |                   |                        |                        | 10.31       |       |
|                        |                              |                   |                        |                        | 9.54        |       |
|                        |                              |                   |                        |                        | 15.65       |       |
|                        |                              |                   |                        |                        | 8.54        |       |
|                        |                              |                   |                        |                        | 1.58        |       |
|                        |                              |                   |                        |                        | 2.77        |       |
|                        |                              |                   |                        |                        | 0.77        |       |
|                        |                              |                   |                        |                        | 1.67        |       |
|                        |                              |                   |                        |                        | 0.44        |       |
| Ponds/Lakes/Reservoirs | Yin et al (2008)             | NE Coast of China | Meiliang Bay/Wuli Lake | 0                      | 1.22        | 0.861 |
|                        |                              |                   |                        |                        | 1.17        |       |
|                        |                              |                   |                        |                        | 1.08        |       |
|                        |                              |                   |                        |                        | 0.82        |       |
|                        |                              |                   |                        |                        | 0.66        |       |
|                        |                              |                   |                        |                        | 0.76        |       |
|                        |                              |                   |                        |                        | 0.32        |       |
|                        |                              |                   |                        |                        | 0.54        |       |
| Ponds/Lakes/Reservoirs | Zheng et al (2004)           | E China           | Lake Dongbu            | Hypertrophic           | 19.50       | 7.53  |
|                        |                              |                   |                        |                        | 1.70        |       |
|                        |                              |                   |                        |                        | 1.40        |       |
|                        |                              |                   |                        | Eutrophic              | 7.60        | 3.57  |
|                        |                              |                   |                        |                        | 2.20        |       |
|                        |                              |                   |                        |                        | 0.90        |       |
|                        |                              |                   |                        | Mesotrophic            | 1.40        | 1.60  |
|                        |                              |                   |                        |                        | 0.90        |       |

| Waterbody Type   | Study                  | Region                   | Sites           | Sub-sites  | AVS umole/g | Means  |
|------------------|------------------------|--------------------------|-----------------|------------|-------------|--------|
| Estuarine/Marine | Alves et al (2007)     | SE Coast of Brazil       | Sal River       |            | 2.50        | 17.24  |
|                  |                        |                          |                 | 1A         | 13.7        |        |
|                  |                        |                          |                 | 1B         | 23.7        |        |
|                  |                        |                          |                 | 1C         | 16.1        |        |
|                  |                        |                          |                 | 1D         | 15.8        |        |
|                  |                        |                          |                 | 1E         | 16.9        |        |
|                  |                        |                          | Sergipe River   | 8A         | 1.9         | 6.1625 |
|                  |                        |                          |                 | 8B         | 13.6        |        |
|                  |                        |                          |                 | 8C         | 12.3        |        |
|                  |                        |                          |                 | 8D         | 7.8         |        |
|                  |                        |                          |                 | 8E         | 4.5         |        |
|                  |                        |                          |                 | 8F         | 1.9         |        |
|                  |                        |                          |                 | 8G         | 3.4         |        |
|                  |                        |                          |                 | 8H         | 3.9         |        |
|                  |                        |                          | Poxim River     | 19A        | 2.2         | 7.65   |
|                  |                        |                          |                 | 19B        | 4.8         |        |
|                  |                        |                          |                 | 19C        | 5.9         |        |
|                  |                        |                          |                 | 19D        | 8.2         |        |
|                  |                        |                          |                 | 19E        | 3.8         |        |
|                  |                        |                          |                 | 19F        | 5.8         |        |
|                  |                        |                          |                 | 19G        | 18          |        |
|                  |                        |                          |                 | 19H        | 12.5        |        |
| Estuarine/Marine | Ankley et al (1991)    | SE New York State, USA   | Estuarine marsh | 1          | 0.30        | 15.38  |
|                  |                        |                          |                 | 2          | 0.47        |        |
|                  |                        |                          |                 | 3          | 3.09        |        |
|                  |                        |                          |                 | 4          | 0.09        |        |
|                  |                        |                          |                 | 5          | 5.93        |        |
|                  |                        |                          |                 | 6          | 8.72        |        |
|                  |                        |                          |                 | 7          | 14.78       |        |
|                  |                        |                          |                 | 8          | 14.42       |        |
|                  |                        |                          |                 | 9          | 75.49       |        |
|                  |                        |                          |                 | 10         | 23.03       |        |
|                  |                        |                          |                 | 11         | 55.31       |        |
|                  |                        |                          |                 | 12         | 2.43        |        |
|                  |                        |                          |                 | 13         | 2.55        |        |
|                  |                        |                          |                 | 14         | 28.43       |        |
|                  |                        |                          |                 | 15         | 21.96       |        |
|                  |                        |                          |                 | 16         | 1.54        |        |
|                  |                        |                          |                 | 17         | 2.97        |        |
| Estuarine/Marine | Arfaeinia et al (2016) | Persian Gulf Coast, Iran | Autumn          | Urban      | 0.44        | 0.44   |
|                  |                        |                          |                 | Industrial | 11.62       | 11.62  |
|                  |                        |                          | Spring          | Urban      | 0.29        | 0.29   |

| Waterbody Type   | Study                | Region   | Sites           | Sub-sites  | AVS umole/g | Means |
|------------------|----------------------|----------|-----------------|------------|-------------|-------|
| Estuarine/Marine | Campana et al (2005) | SW Spain | A               | Industrial | 6.34        | 6.34  |
|                  |                      |          |                 | 1          | 0.594       | 1.237 |
|                  |                      |          |                 | 2          | 1.533       |       |
|                  |                      |          |                 | 3          | 2.362       |       |
|                  |                      |          |                 | 4          | 1.086       |       |
|                  |                      |          |                 | 5          | 0.608       |       |
|                  |                      |          | B               | 1          | 0.760       | 0.786 |
|                  |                      |          |                 | 2          | 0.730       |       |
|                  |                      |          |                 | 3          | 1.291       |       |
|                  |                      |          |                 | 4          | 0.512       |       |
|                  |                      |          |                 | 5          | 0.635       |       |
|                  |                      |          | C               | 1          | 1.136       | 7.886 |
|                  |                      |          |                 | 2          | 8.283       |       |
|                  |                      |          |                 | 3          | 20.169      |       |
|                  |                      |          |                 | 4          | 1.776       |       |
|                  |                      |          |                 | 5          | 8.064       |       |
| Estuarine/Marine | Campana et al (2009) | SW Spain | Harbor/Port     | G1         | 1.05        | 2.67  |
|                  |                      |          |                 | G1         | 1.24        |       |
|                  |                      |          |                 | G1         | 1.47        |       |
|                  |                      |          |                 | G1         | 1.82        |       |
|                  |                      |          |                 | G1         | 3.49        |       |
|                  |                      |          |                 | G1         | 6.95        |       |
|                  |                      |          | Ag & salt marsh | G2         | 1.02        | 4.40  |
|                  |                      |          |                 | G2         | 1.03        |       |
|                  |                      |          |                 | G2         | 1.92        |       |
|                  |                      |          |                 | G2         | 3.56        |       |
|                  |                      |          |                 | G2         | 3.84        |       |
|                  |                      |          |                 | G2         | 4.29        |       |
|                  |                      |          |                 | G3         | 0.89        |       |
|                  |                      |          |                 | G3         | 1.35        |       |
|                  |                      |          |                 | G3         | 2.63        |       |
|                  |                      |          |                 | G3         | 4.28        |       |
|                  |                      |          |                 | G3         | 15.26       |       |
|                  |                      |          |                 | G3         | 22.45       |       |
|                  |                      |          |                 | S1         | 1.27        |       |
|                  |                      |          |                 | S1         | 1.41        |       |
|                  |                      |          |                 | S1         | 2.48        |       |
|                  |                      |          |                 | S1         | 6.49        |       |
|                  |                      |          |                 | S1         | 8.96        |       |
|                  |                      |          |                 | S1         | nd          |       |
|                  |                      |          |                 | S2         | 0.86        |       |
|                  |                      |          |                 | S2         | 1.02        |       |

| Waterbody Type   | Study             | Region                 | Sites             | Sub-sites | AVS umole/g | Means |
|------------------|-------------------|------------------------|-------------------|-----------|-------------|-------|
|                  |                   |                        |                   | S2        | 1.75        | 3.787 |
|                  |                   |                        |                   | S2        | 4.77        |       |
|                  |                   |                        |                   | S2        | 7.56        |       |
|                  |                   |                        |                   | S2        | 9.84        |       |
|                  |                   |                        |                   | S3        | 0.9         |       |
|                  |                   |                        |                   | S3        | 1.23        |       |
|                  |                   |                        |                   | S3        | 1.54        |       |
|                  |                   |                        |                   | S3        | 2.06        |       |
|                  |                   |                        |                   | S3        | 3.35        |       |
|                  |                   |                        |                   | S3        | 5.69        |       |
|                  |                   |                        |                   | S4        | 0.65        |       |
|                  |                   |                        |                   | S4        | 1.06        |       |
|                  |                   |                        |                   | S4        | 1.45        |       |
|                  |                   |                        |                   | S4        | 3.76        |       |
|                  |                   |                        |                   | S4        | 6.12        |       |
|                  |                   |                        |                   | S4        | 7.16        |       |
|                  |                   |                        |                   | S5        | 0.75        |       |
|                  |                   |                        |                   | S5        | 1.28        |       |
|                  |                   |                        |                   | S5        | 1.43        |       |
|                  |                   |                        |                   | S5        | 4.37        |       |
|                  |                   |                        |                   | S5        | 4.57        |       |
|                  |                   |                        |                   | S5        | 5.56        |       |
|                  |                   |                        |                   | S6        | 1.02        |       |
|                  |                   |                        |                   | S6        | 2.82        |       |
|                  |                   |                        |                   | S6        | 3.74        |       |
|                  |                   |                        |                   | S6        | 4.62        |       |
|                  |                   |                        |                   | S6        | 5.3         |       |
|                  |                   |                        |                   | S6        | 7.71        |       |
|                  |                   |                        |                   | S7        | 1.33        |       |
|                  |                   |                        |                   | S7        | 1.79        |       |
|                  |                   |                        |                   | S7        | 2.24        |       |
|                  |                   |                        |                   | S7        | 11.24       |       |
|                  |                   |                        |                   | S7        | 11.84       |       |
|                  |                   |                        |                   | S7        | 17.66       |       |
| Estuarine/Marine | Chai et al (2015) | Shenzhen Bay, SE China | AVS umols 0-10 cm | 1         | 4.220       | 3.787 |
|                  |                   |                        |                   | 2         | 2.697       |       |
|                  |                   |                        |                   | 3         | 2.157       |       |
|                  |                   |                        |                   | 4         | 1.942       |       |
|                  |                   |                        |                   | 5         | 10.220      |       |
|                  |                   |                        |                   | 6         | 4.584       |       |
|                  |                   |                        |                   | 7         | 5.191       |       |
|                  |                   |                        |                   | 8         | 3.425       |       |

| Waterbody Type   | Study                | Region                          | Sites               | Sub-sites                       | AVS umole/g | Means |
|------------------|----------------------|---------------------------------|---------------------|---------------------------------|-------------|-------|
|                  |                      |                                 |                     | 9                               | 3.438       | 2.172 |
|                  |                      |                                 |                     | 10                              | 3.573       |       |
|                  |                      |                                 |                     | 11                              | 0.216       |       |
|                  |                      |                                 |                     | 12                              | 2.710       |       |
|                  |                      |                                 |                     | 13                              | 5.730       |       |
|                  |                      |                                 |                     | 14                              | 0.189       |       |
|                  |                      |                                 |                     | 15                              | 1.483       |       |
|                  |                      |                                 |                     | 16                              | 8.818       |       |
|                  |                      |                                 |                     | AVS umols 10-20 cm              | 1           |       |
|                  |                      |                                 |                     |                                 | 2           |       |
|                  |                      |                                 |                     |                                 | 3           |       |
|                  |                      |                                 |                     |                                 | 4           |       |
|                  |                      |                                 |                     |                                 | 5           |       |
|                  |                      |                                 |                     |                                 | 6           |       |
|                  |                      |                                 |                     |                                 | 7           |       |
|                  |                      |                                 |                     |                                 | 8           |       |
|                  |                      |                                 |                     |                                 | 9           |       |
|                  |                      |                                 |                     |                                 | 10          |       |
|                  |                      |                                 |                     |                                 | 11          |       |
|                  |                      |                                 |                     |                                 | 12          |       |
|                  |                      |                                 |                     |                                 | 13          |       |
|                  |                      |                                 |                     |                                 | 14          |       |
|                  |                      |                                 |                     |                                 | 15          |       |
|                  |                      |                                 |                     |                                 | 16          |       |
| Estuarine/Marine | Di Toro et al (1990) | S New York & S Connecticut, USA |                     | Black Rock Harbor               | 175         | 93.8  |
|                  |                      |                                 |                     | Hudson River                    | 12.6        |       |
| Estuarine/Marine | Di Toro et al (1992) | S Connecticut & S Road Is., USA |                     | Central Long Island Sound, NY   | 15          | 8.15  |
|                  |                      |                                 |                     | Salt water pond in Ninigret, RI | 1.3         |       |
| Estuarine/Marine | Fang et al (2005)    | SE China Coast                  | Pearl River Estuary | 1                               | 0.21        | 1.59  |
|                  |                      |                                 |                     | 3                               | 2.77        |       |
|                  |                      |                                 |                     | 4                               | 2.18        |       |
|                  |                      |                                 |                     | 5                               | 3.89        |       |
|                  |                      |                                 |                     | 6                               | <0.01       |       |
|                  |                      |                                 |                     | 7                               | 0.48        |       |
| Estuarine/Marine | Gao et al (2013)     | NE China Coast                  | industrialized      | Laizhou Bay                     | 1.22        | 2.99  |
|                  |                      |                                 |                     |                                 | 7.6         |       |
|                  |                      |                                 | in coastal sea      | Zhangzi Island                  | 0.71        | 4.05  |
|                  |                      |                                 |                     |                                 | 11.03       |       |
| Estuarine/Marine | Hansen et al (1996)  | NE China Coast                  | Jinzhou Bay         | 1                               | 44.70       | 33.87 |
|                  |                      |                                 |                     | 2                               | 126.00      |       |
|                  |                      |                                 |                     | 3                               | 17.80       |       |
|                  |                      |                                 |                     | 4                               | 36.60       |       |

| Waterbody Type   | Study                   | Region                          | Sites                   | Sub-sites        | AVS umole/g | Means  |       |
|------------------|-------------------------|---------------------------------|-------------------------|------------------|-------------|--------|-------|
|                  |                         |                                 |                         | 5                | 3.02        | 48.16  |       |
|                  |                         |                                 |                         | 6                | 5.42        |        |       |
|                  |                         |                                 |                         | 7                | 3.56        |        |       |
|                  |                         |                                 |                         | Belledune Harbor | 1           | 27.20  | 48.16 |
|                  |                         |                                 |                         | 2                | 80.30       |        |       |
|                  |                         |                                 |                         | 3                | 102.00      |        |       |
|                  |                         |                                 |                         | 4                | 96.60       |        |       |
|                  |                         |                                 |                         | 5                | 47.40       |        |       |
|                  |                         |                                 |                         | 6                | 38.50       |        |       |
|                  |                         |                                 |                         | 7                | 56.10       |        |       |
|                  |                         |                                 |                         | 8                | 5.54        |        |       |
|                  |                         |                                 |                         | 9                | 16.70       |        |       |
|                  |                         |                                 |                         | 10               | 11.30       |        |       |
|                  |                         |                                 |                         | Bear Creek       | 1           | 268.00 | 78.87 |
|                  |                         |                                 |                         | 2                | 304.00      |        |       |
|                  |                         |                                 |                         | 3                | 76.10       |        |       |
|                  |                         |                                 |                         | 4                | 70.10       |        |       |
|                  |                         |                                 |                         | 5                | 45.30       |        |       |
|                  |                         |                                 |                         | 6                | 46.60       |        |       |
|                  |                         |                                 |                         | 7                | 0.40        |        |       |
|                  |                         |                                 |                         | 8                | 146.00      |        |       |
|                  |                         |                                 |                         | 9                | 89.20       |        |       |
|                  |                         |                                 |                         | 10               | 0.45        |        |       |
|                  |                         |                                 |                         | 11               | 50.00       |        |       |
|                  |                         |                                 |                         | 12               | 0.40        |        |       |
|                  |                         |                                 |                         | 13               | 7.20        |        |       |
|                  |                         |                                 |                         | 14               | 0.40        |        |       |
| Estuarine/Marine | Hinkey and Zaidi (2007) | S St. Thomas, US Virgin Islands | CBM Marina              | 1                | 1.30        | 0.67   |       |
|                  |                         |                                 |                         | 2                | 0.39        |        |       |
|                  |                         |                                 |                         | 3                | 0.24        |        |       |
|                  |                         |                                 |                         | OUT              | 0.73        |        |       |
|                  |                         |                                 |                         | IBY Marina       | 1           | 29.00  | 29.00 |
|                  |                         |                                 |                         |                  | 2           | 25.00  |       |
|                  |                         |                                 |                         |                  | OUT         | 33.00  |       |
| Estuarine/Marine | Li et al (2014a)        | SE China Coast                  | Leizhou Peninsula coast | Min.             | 0.109       | 4.45   |       |
|                  |                         |                                 |                         | Max.             | 55.6        |        |       |
| Estuarine/Marine | Li et al (2014b)        | SE China Coast                  | Bohai & Laizhou Bays    | Min.             | 0.05        | 0.73   |       |
|                  |                         |                                 |                         | Max.             | 5.8         |        |       |
| Estuarine/Marine | Liu et al (2007)        | SE China Coast                  | Jiulong River Estuary   | 1                | 0.46        | 4.76   |       |
|                  |                         |                                 |                         | 2                | 0.67        |        |       |
|                  |                         |                                 |                         | 3                | 1.35        |        |       |
|                  |                         |                                 |                         | 4                | 3.17        |        |       |

| Waterbody Type | Study | Region | Sites | Sub-sites | AVS umole/g | Means |
|----------------|-------|--------|-------|-----------|-------------|-------|
|                |       |        |       | 5         | 6.55        |       |
|                |       |        |       | 6         | 6.47        |       |
|                |       |        |       | 7         | 8.41        |       |
|                |       |        |       | 8         | 5.67        |       |
|                |       |        |       | 9         | 4.07        |       |
|                |       |        |       | 1         | 0.45        |       |
|                |       |        |       | 2         | 0.36        |       |
|                |       |        |       | 3         | 0.24        |       |
|                |       |        |       | 4         | 1.32        |       |
|                |       |        |       | 5         | 4.42        |       |
|                |       |        |       | 6         | 2.52        |       |
|                |       |        |       | 7         | 2.22        |       |
|                |       |        |       | 8         | 1.88        |       |
|                |       |        |       | 9         | 1.86        |       |
|                |       |        |       | 1         | 0.45        |       |
|                |       |        |       | 2         | 0.71        |       |
|                |       |        |       | 3         | 2.47        |       |
|                |       |        |       | 4         | 5.06        |       |
|                |       |        |       | 5         | 8.14        |       |
|                |       |        |       | 6         | 6.37        |       |
|                |       |        |       | 7         | 6.78        |       |
|                |       |        |       | 8         | 3.37        |       |
|                |       |        |       | 9         | 4.55        |       |
|                |       |        |       | 1         | 0.54        |       |
|                |       |        |       | 2         | 0.65        |       |
|                |       |        |       | 3         | 2.20        |       |
|                |       |        |       | 4         | 8.89        |       |
|                |       |        |       | 5         | 10.71       |       |
|                |       |        |       | 6         | 12.50       |       |
|                |       |        |       | 7         | 8.37        |       |
|                |       |        |       | 8         | 5.75        |       |
|                |       |        |       | 9         | 5.16        |       |
|                |       |        |       | 1         | 0.40        |       |
|                |       |        |       | 2         | 0.44        |       |
|                |       |        |       | 3         | 0.80        |       |
|                |       |        |       | 4         | 1.75        |       |
|                |       |        |       | 5         | 4.68        |       |
|                |       |        |       | 6         | 6.43        |       |
|                |       |        |       | 7         | 9.86        |       |
|                |       |        |       | 8         | 8.69        |       |
|                |       |        |       | 9         | 7.53        |       |
|                |       |        |       | 1         | 0.52        |       |

| Waterbody Type   | Study                     | Region                       | Sites              | Sub-sites | AVS umole/g | Means |
|------------------|---------------------------|------------------------------|--------------------|-----------|-------------|-------|
| Estuarine/Marine | Liu et al (2010)          | SE China Coast               | Mangrove           | 2         | 2.41        | 1.99  |
|                  |                           |                              |                    | 3         | 2.82        |       |
|                  |                           |                              |                    | 4         | 4.65        |       |
|                  |                           |                              |                    | 5         | 9.03        |       |
|                  |                           |                              |                    | 6         | 12.56       |       |
|                  |                           |                              |                    | 7         | 10.32       |       |
|                  |                           |                              |                    | 8         | 16.10       |       |
|                  |                           |                              |                    | 9         | 13.46       |       |
|                  |                           |                              | Fringe             | 1         | 4.96        | 3.50  |
|                  |                           |                              |                    | 2         | 3.71        |       |
|                  |                           |                              |                    | 3         | 2.41        |       |
|                  |                           |                              |                    | 4         | 0.51        |       |
|                  |                           |                              |                    | 5         | 0.98        |       |
|                  |                           |                              |                    | 6         | 0.66        |       |
|                  |                           |                              |                    | 7         | 0.69        |       |
| Estuarine/Marine | Machado et al (2004)      | SE Brazil Coast              | Mudflat            | 1         | 6.44        | 7.13  |
|                  |                           |                              |                    | 2         | 4.85        |       |
|                  |                           |                              |                    | 3         | 5.40        |       |
|                  |                           |                              |                    | 4         | 1.16        |       |
|                  |                           |                              |                    | 5         | 1.38        |       |
|                  |                           |                              |                    | 6         | 2.86        |       |
|                  |                           |                              |                    | 7         | 2.43        |       |
|                  |                           |                              | Iguacu River Core  | 0–2       | 11.47       | 182   |
|                  |                           |                              |                    | 2–4       | 12.25       |       |
|                  |                           |                              |                    | 8–10      | 10.43       |       |
|                  |                           |                              |                    | 18–20     | 2.65        |       |
|                  |                           |                              |                    | 28–30     | 5.27        |       |
|                  |                           |                              |                    | 38–40     | 4.86        |       |
|                  |                           |                              |                    |           | 3.01        |       |
| Estuarine/Marine | Mayer and Gersberg (1997) | S San Diego, California, USA | Guanabara Bay Core | 0–2       | 97          | 139   |
|                  |                           |                              |                    | 2–4       | 33          |       |
|                  |                           |                              |                    | 8–10      | 196         |       |
|                  |                           |                              |                    | 18–20     | 193         |       |
|                  |                           |                              |                    | 28–30     | 314         |       |
|                  |                           |                              | Drain outfall      | 38–40     | 261         | 29.6  |
|                  |                           |                              |                    | 0–2       | 187         |       |
|                  |                           |                              |                    | 2–4       | 245         |       |
|                  |                           |                              |                    | 8–10      | 179         |       |
|                  |                           |                              |                    | 18–20     | 110         |       |
|                  |                           |                              |                    | 28–30     | 48          |       |
|                  |                           |                              |                    | 38–40     | 65          |       |

| Waterbody Type   | Study                             | Region                   | Sites              | Sub-sites | AVS umole/g | Means  |
|------------------|-----------------------------------|--------------------------|--------------------|-----------|-------------|--------|
| Estuarine/Marine | Maryland Dept. of Environ. (2021) | Baltimore, Maryland, USA | Marsh              | 1         | 22.6        | 37.0   |
|                  |                                   |                          |                    | 1         | 24.8        |        |
|                  |                                   |                          |                    | 3         | 41.0        |        |
|                  |                                   |                          |                    | 3         | 31.2        |        |
|                  |                                   |                          |                    | 3         | 38.7        |        |
|                  |                                   |                          |                    | 7         | 15.3        | 9.2    |
|                  |                                   |                          | Tidal stream       | 7         | 4.3         |        |
|                  |                                   |                          |                    | 7         | 8.1         |        |
|                  |                                   |                          | Middle Harbor Jul. | BH-27     | 0.02        | 121.44 |
|                  |                                   |                          |                    | BH-36     | 0.13        |        |
|                  |                                   |                          |                    | BH-DC3    | 2.32        |        |
|                  |                                   |                          |                    | BH-25     | 20.31       |        |
|                  |                                   |                          |                    | BH-37     | 22.46       |        |
|                  |                                   |                          |                    | BH-23     | 23.76       |        |
|                  |                                   |                          |                    | BH-53     | 35.09       |        |
|                  |                                   |                          |                    | BH-39     | 58.58       |        |
|                  |                                   |                          |                    | BH-54     | 127.93      |        |
|                  |                                   |                          |                    | BH-24     | 133.28      |        |
|                  |                                   |                          |                    | BH-38     | 133.63      |        |
|                  |                                   |                          |                    | BH-DC4    | 163.57      |        |
|                  |                                   |                          |                    | BH-43     | 463.52      |        |
|                  |                                   |                          |                    | BH-41     | 515.62      |        |
|                  |                                   |                          | Middle Harbor Sep. | BH-27     | 0.01        | 77.48  |
|                  |                                   |                          |                    | BH-36     | 0.11        |        |
|                  |                                   |                          |                    | BH-25     | 8.26        |        |
|                  |                                   |                          |                    | BH-23     | 11.71       |        |
|                  |                                   |                          |                    | BH-43     | 18.00       |        |
|                  |                                   |                          |                    | BH-54     | 61.11       |        |
|                  |                                   |                          |                    | BH-DC4    | 77.07       |        |
|                  |                                   |                          |                    | BH-DC3    | 82.58       |        |
|                  |                                   |                          |                    | BH-24     | 94.62       |        |
|                  |                                   |                          |                    | BH-39     | 96.59       |        |
|                  |                                   |                          |                    | BH-53     | 142.15      |        |
|                  |                                   |                          |                    | BH-38     | 146.20      |        |
|                  |                                   |                          |                    | BH-37     | 160.74      |        |
|                  |                                   |                          |                    | BH-41     | 185.59      |        |
|                  |                                   |                          | Curtis Bay Jul.    | BH-DC5    | 106.18      | 502.72 |
|                  |                                   |                          |                    | BH-47     | 133.64      |        |
|                  |                                   |                          |                    | BH-52     | 308.69      |        |
|                  |                                   |                          |                    | BH-DC6    | 485.48      |        |
|                  |                                   |                          |                    | BH-51     | 591.40      |        |
|                  |                                   |                          |                    | BH-45     | 615.25      |        |

| Waterbody Type   | Study                 | Region             | Sites          | Sub-sites | AVS umole/g | Means  |
|------------------|-----------------------|--------------------|----------------|-----------|-------------|--------|
| Estuarine/Marine | Mucha et al (2005)    | N Portugal Coast   | II             | BH-49     | 619.52      | 173.94 |
|                  |                       |                    |                | BH-44     | 804.86      |        |
|                  |                       |                    |                | BH-50     | 859.42      |        |
|                  |                       |                    |                | BH-47     | 1.54        |        |
|                  |                       |                    |                | BH-51     | 91.93       |        |
|                  |                       |                    |                | BH-52     | 131.64      |        |
|                  |                       |                    |                | BH-50     | 141.73      |        |
|                  |                       |                    |                | BH-45     | 155.63      |        |
|                  |                       |                    |                | BH-44     | 167.87      |        |
|                  |                       |                    |                | BH-DC5    | 203.85      |        |
|                  |                       |                    |                | BH-49     | 238.15      |        |
|                  |                       |                    |                | BH-DC6    | 433.10      |        |
|                  |                       |                    |                | Winter    | 2.800       | 2.000  |
|                  |                       |                    |                | Spring    | 2.200       |        |
|                  |                       |                    |                | Summer    | 1.700       |        |
|                  |                       |                    |                | Fall      | 1.300       |        |
| Estuarine/Marine | Nasr et al (2014)     | N Egypt Coast      | III            | Winter    | 2.000       | 1.173  |
|                  |                       |                    |                | Spring    | 1.600       |        |
|                  |                       |                    |                | Summer    | 0.090       |        |
|                  |                       |                    |                | Fall      | 1.000       |        |
|                  |                       |                    | IV             | Winter    | 0.230       | 0.368  |
|                  |                       |                    |                | Spring    | 0.340       |        |
|                  |                       |                    |                | Summer    | 0.150       |        |
|                  |                       |                    |                | Fall      | 0.750       |        |
|                  |                       |                    | V              | Winter    | 0.004       | 0.189  |
|                  |                       |                    |                | Spring    | 0.310       |        |
|                  |                       |                    |                | Summer    | 0.070       |        |
|                  |                       |                    |                | Fall      | 0.370       |        |
| Estuarine/Marine | Nizoli & Silva (2012) | SE Coast of Brazil | Western Region | Min       | 0.015       | 3.307  |
|                  |                       |                    |                | Max       | 31.326      |        |
|                  |                       |                    | Middle region  | Min       | 0.038       | 0.058  |
|                  |                       |                    |                | Max       | 0.11        |        |
|                  |                       |                    | Eastern region | Min       | 0.029       | 0.074  |
|                  |                       |                    |                | Max       | 0.119       |        |
| Estuarine/Marine | Nizoli & Silva (2012) | SE Coast of Brazil | CA-W           | 0–3       | 1.73        | 1.86   |
|                  |                       |                    |                | 3–6       | 0.45        |        |
|                  |                       |                    |                | 6–9       | 0.04        |        |
|                  |                       |                    |                | 9–12      | 0.07        |        |
|                  |                       |                    |                | 12–18     | 0.08        |        |
|                  |                       |                    |                | 18–24     | 0.08        |        |
|                  |                       |                    |                | 24–30     | 0.05        |        |
|                  |                       |                    |                | 30–40     | 0.28        |        |

| Waterbody Type | Study | Region | Sites | Sub-sites | AVS umole/g | Means |
|----------------|-------|--------|-------|-----------|-------------|-------|
|                |       |        |       | 40–50     | 0.26        |       |
|                |       |        |       | 50–60     | 0.10        |       |
|                |       |        | CA-S  | 0–3       | 0.52        |       |
|                |       |        |       | 3–6       | 0.94        |       |
|                |       |        |       | 6–9       | 0.19        |       |
|                |       |        |       | 9–12      | 0.20        |       |
|                |       |        |       | 12–18     | 0.28        |       |
|                |       |        |       | 18–24     | 0.44        |       |
|                |       |        |       | 24–30     | 0.12        |       |
|                |       |        |       | 30–40     | 0.15        |       |
|                |       |        |       | 40–50     | 0.21        |       |
|                |       |        |       | 50–60     | 0.31        |       |
|                |       |        | MR-W  | 0–3       | 2.12        |       |
|                |       |        |       | 3–6       | 31.90       |       |
|                |       |        |       | 6–9       | 9.55        |       |
|                |       |        |       | 9–12      | 7.61        |       |
|                |       |        |       | 12–18     | 1.81        |       |
|                |       |        |       | 18–24     | 0.88        |       |
|                |       |        |       | 24–30     | 2.35        |       |
|                |       |        |       | 30–40     | 1.02        |       |
|                |       |        |       | 40–50     | 5.18        |       |
|                |       |        |       | 50–60     | 0.36        |       |
|                |       |        |       | 60–70     | 1.17        |       |
|                |       |        | MR-S  | 0–3       | 0.90        |       |
|                |       |        |       | 3–6       | 5.79        |       |
|                |       |        |       | 6–9       | 1.04        |       |
|                |       |        |       | 9–12      | 0.41        |       |
|                |       |        |       | 12–18     | 0.39        |       |
|                |       |        |       | 18–24     | 0.89        |       |
|                |       |        |       | 24–30     | 0.72        |       |
|                |       |        |       | 30–40     | 1.27        |       |
|                |       |        |       | 40–50     | 0.47        |       |
|                |       |        |       | 50–60     | 0.43        |       |
|                |       |        |       | 60–70     | 4.39        |       |
|                |       |        | CB-S  | 0–3       | 0.21        |       |
|                |       |        |       | 3–6       | 0.06        |       |
|                |       |        |       | 6–9       | 0.86        |       |
|                |       |        |       | 9–12      | 1.88        |       |
|                |       |        |       | 12–18     | 1.69        |       |
|                |       |        |       | 18–24     | 0.46        |       |
|                |       |        |       | 24–30     | 2.17        |       |
|                |       |        |       | 30–40     | 0.11        |       |

| Waterbody Type   | Study                        | Region                | Sites                   | Sub-sites         | AVS umole/g | Means |
|------------------|------------------------------|-----------------------|-------------------------|-------------------|-------------|-------|
|                  |                              |                       |                         | 40–50             | 0.47        |       |
| Estuarine/Marine | Pignotti et al (2018)        | Ravenna, NE Italy     | Pialassa Piomboni       | Min               | 0.03        | 3.1   |
|                  |                              |                       |                         | Max               | 8.8         |       |
| Estuarine/Marine | Remali et al (2018)          | SE Coast of Australia |                         | Lane Cove Estuary | <0.5        | <0.5  |
| Estuarine/Marine | Shyleshchandran et al (2018) | SW Coast of India     | Pre-monsoon             | 1                 | 1.90        | 1.01  |
|                  |                              |                       |                         | 2                 | 1.10        |       |
|                  |                              |                       |                         | 3                 | 1.01        |       |
|                  |                              |                       |                         | 4                 | 0.74        |       |
|                  |                              |                       |                         | 5                 | 0.80        |       |
|                  |                              |                       |                         | 6                 | 0.65        |       |
|                  |                              |                       |                         | 7                 | 0.92        |       |
|                  |                              |                       |                         | 8                 | 0.69        |       |
|                  |                              |                       |                         | 9                 | 2.40        |       |
|                  |                              |                       |                         | 10                | 1.23        |       |
|                  |                              |                       |                         | 11                | 0.39        |       |
|                  |                              |                       |                         | 12                | 0.27        |       |
|                  |                              |                       | Monsoon                 | 1                 | 3.12        | 1.65  |
|                  |                              |                       |                         | 2                 | 1.50        |       |
|                  |                              |                       |                         | 3                 | 1.91        |       |
|                  |                              |                       |                         | 4                 | 2.10        |       |
|                  |                              |                       |                         | 5                 | 0.93        |       |
|                  |                              |                       |                         | 6                 | 3.31        |       |
|                  |                              |                       |                         | 7                 | 0.74        |       |
|                  |                              |                       |                         | 8                 | 1.41        |       |
|                  |                              |                       |                         | 9                 | 1.20        |       |
|                  |                              |                       |                         | 10                | 1.29        |       |
|                  |                              |                       |                         | 11                | 1.00        |       |
|                  |                              |                       |                         | 12                | 1.32        |       |
|                  |                              |                       | Post-monsoon            | 1                 | 3.28        | 0.78  |
|                  |                              |                       |                         | 2                 | 3.25        |       |
|                  |                              |                       |                         | 3                 | 1.31        |       |
|                  |                              |                       |                         | 4                 | 0.22        |       |
|                  |                              |                       |                         | 5                 | 0.22        |       |
|                  |                              |                       |                         | 6                 | 0.12        |       |
|                  |                              |                       |                         | 7                 | 0.12        |       |
|                  |                              |                       |                         | 8                 | 0.14        |       |
|                  |                              |                       |                         | 9                 | 0.14        |       |
|                  |                              |                       |                         | 10                | 0.14        |       |
|                  |                              |                       |                         | 11                | 0.10        |       |
|                  |                              |                       |                         | 12                | 0.30        |       |
| Estuarine/Marine | Silva et al (2016)           | SE Brazil Coast       | Sao Paulo River Estuary | Jun               | 2.02        | 1.83  |
|                  |                              |                       |                         |                   | 1.83        |       |

| Waterbody Type   | Study          | Region             | Sites                    | Sub-sites             | AVS umole/g | Means |
|------------------|----------------|--------------------|--------------------------|-----------------------|-------------|-------|
|                  |                |                    |                          |                       | 1.95        | 1.63  |
|                  |                |                    |                          |                       | 1.83        |       |
|                  |                |                    |                          |                       | 1.72        |       |
|                  |                |                    |                          |                       | 1.66        |       |
|                  |                |                    |                          |                       | 1.81        |       |
|                  |                |                    |                          | Sep                   | 1.43        |       |
|                  |                |                    |                          |                       | 1.58        |       |
|                  |                |                    |                          |                       | 1.61        |       |
|                  |                |                    |                          |                       | 1.72        |       |
|                  |                |                    |                          |                       | 1.71        |       |
|                  |                |                    |                          |                       | 1.66        |       |
|                  |                |                    |                          |                       | 1.68        |       |
|                  |                |                    |                          | Purge and trap method | 229         |       |
|                  |                |                    |                          |                       | 210         |       |
|                  |                |                    |                          |                       | 199         |       |
| Estuarine/Marine | Simpson (2001) | SE Australia Coast | sites surrounding Sydney |                       | 161         | 70.1  |
|                  |                |                    |                          |                       | 156         |       |
|                  |                |                    |                          |                       | 154         |       |
|                  |                |                    |                          |                       | 149         |       |
|                  |                |                    |                          |                       | 135         |       |
|                  |                |                    |                          |                       | 136         |       |
|                  |                |                    |                          |                       | 125         |       |
|                  |                |                    |                          |                       | 110         |       |
|                  |                |                    |                          |                       | 107         |       |
|                  |                |                    |                          |                       | 92          |       |
|                  |                |                    |                          |                       | 78          |       |
|                  |                |                    |                          |                       | 61          |       |
|                  |                |                    |                          |                       | 59          |       |
|                  |                |                    |                          |                       | 53          |       |
|                  |                |                    |                          |                       | 33          |       |
|                  |                |                    |                          |                       | 26          |       |
|                  |                |                    |                          |                       | 25          |       |
|                  |                |                    |                          |                       | 24.7        |       |
|                  |                |                    |                          |                       | 23.6        |       |
|                  |                |                    |                          |                       | 20          |       |
|                  |                |                    |                          |                       | 15.7        |       |
|                  |                |                    |                          |                       | 14.6        |       |
|                  |                |                    |                          |                       | 12.3        |       |
|                  |                |                    |                          |                       | 10          |       |
|                  |                |                    |                          |                       | 9.3         |       |
|                  |                |                    |                          |                       | 9.1         |       |
|                  |                |                    |                          |                       | 5.2         |       |

| Waterbody Type   | Study                     | Region      | Sites     | Sub-sites                                        | AVS umole/g | Means |
|------------------|---------------------------|-------------|-----------|--------------------------------------------------|-------------|-------|
| Estuarine/Marine | Van Den Hoop et al (1997) | Netherlands | Estuarine | 3 Appelzak<br>4 Geul Zandvliet /Berendrechtsluis | 5.1         | 54.6  |
|                  |                           |             |           |                                                  | 2.8         |       |
|                  |                           |             |           |                                                  | 0.9         |       |
|                  |                           |             |           |                                                  | 0.8         |       |
|                  |                           |             |           |                                                  | 0.6         |       |
|                  |                           |             |           |                                                  | 178         |       |
|                  |                           |             |           |                                                  | 138         |       |
|                  |                           |             |           |                                                  | 157         |       |
|                  |                           |             |           |                                                  | 140         |       |
|                  |                           |             |           |                                                  | 120         |       |
|                  |                           |             |           |                                                  | 97          |       |
|                  |                           |             |           |                                                  | 120         |       |
|                  |                           |             |           |                                                  | 117         |       |
|                  |                           |             |           |                                                  | 85          |       |
|                  |                           |             |           |                                                  | 107         |       |
|                  |                           |             |           |                                                  | 95          |       |
|                  |                           |             |           |                                                  | 84          |       |
|                  |                           |             |           |                                                  | 68          |       |
|                  |                           |             |           |                                                  | 62          |       |
|                  |                           |             |           |                                                  | 55          |       |
|                  |                           |             |           |                                                  | 54          |       |
|                  |                           |             |           |                                                  | 26          |       |
|                  |                           |             |           |                                                  | 22.8        |       |
|                  |                           |             |           |                                                  | 24.8        |       |
|                  |                           |             |           |                                                  | 28          |       |
|                  |                           |             |           |                                                  | 26          |       |
|                  |                           |             |           |                                                  | 23.2        |       |
|                  |                           |             |           |                                                  | 13.4        |       |
|                  |                           |             |           |                                                  | 15.1        |       |
|                  |                           |             |           |                                                  | 13.5        |       |
|                  |                           |             |           |                                                  | 4.8         |       |
|                  |                           |             |           |                                                  | 11.4        |       |
|                  |                           |             |           |                                                  | 6.6         |       |
|                  |                           |             |           |                                                  | 7           |       |
|                  |                           |             |           |                                                  | 5.4         |       |
|                  |                           |             |           |                                                  | 1.5         |       |
|                  |                           |             |           |                                                  | 1.5         |       |
|                  |                           |             |           |                                                  | 0.5         |       |
|                  |                           |             |           |                                                  | 0.5         |       |
|                  |                           |             |           |                                                  | 0.7         |       |
| Estuarine/Marine | Van Den Hoop et al (1997) | Netherlands | Estuarine | 3 Appelzak                                       | 22.60       | 13.19 |
|                  |                           |             |           | 4 Geul Zandvliet /Berendrechtsluis               | 21.20       |       |

| Waterbody Type   | Study             | Region            | Sites              | Sub-sites                          | AVS umole/g | Means |
|------------------|-------------------|-------------------|--------------------|------------------------------------|-------------|-------|
|                  |                   |                   |                    | 5 Geul Boudewijn v Cauwelaertsluis | 20.00       | 2.51  |
|                  |                   |                   |                    | 8 Geul Kallosluis                  | 18.40       |       |
|                  |                   |                   |                    | 13 Drempel van Lillo               | 4.70        |       |
|                  |                   |                   |                    | 14 Drempel van Zandvliet           | 4.10        |       |
|                  |                   |                   |                    | 16 Sluissche Hompels               | 1.30        |       |
|                  |                   |                   | Marine             | 11 Schouwen-Duiveland 1•           | 8.00        |       |
|                  |                   |                   |                    | 12 Schouwen-Duiveland 4•           | 7.40        |       |
|                  |                   |                   |                    | 15 Ter Heijden 4•                  | 2.90        |       |
|                  |                   |                   |                    | 17 Terschelling 100•               | 0.60        |       |
|                  |                   |                   |                    | 18 Vlieland 70•                    | 0.50        |       |
|                  |                   |                   |                    | 19 Vlieland 4•                     | 0.40        |       |
|                  |                   |                   |                    | 20 Terschelling 70•                | 0.20        |       |
|                  |                   |                   |                    | 21 Ter Heijden 2•                  | <0.1        |       |
|                  |                   |                   |                    |                                    | <0.1        |       |
| Estuarine/Marine | Wang et al (2019) | SE Coast of China | Maluan Bay         | ML1                                | 8.33        | 4.80  |
|                  |                   |                   |                    | ML2                                | 5.03        |       |
|                  |                   |                   |                    | ML3                                | 7.31        |       |
|                  |                   |                   |                    | ML4                                | 4.80        |       |
|                  |                   |                   |                    | ML5                                | 4.52        |       |
|                  |                   |                   |                    | ML6                                | 1.76        |       |
|                  |                   |                   |                    | ML7                                | 3.18        |       |
|                  |                   |                   |                    | ML8                                | 3.52        |       |
| Estuarine/Marine | Yang et al (2014) | SE China Coast    | Pearl River Spring | S1                                 | <0.01       | 5.10  |
|                  |                   |                   |                    |                                    | <0.01       |       |
|                  |                   |                   |                    |                                    | <0.01       |       |
|                  |                   |                   |                    |                                    | 11.23       |       |
|                  |                   |                   |                    |                                    | 27.47       |       |
|                  |                   |                   |                    |                                    | 23.05       |       |
|                  |                   |                   |                    |                                    | 19.12       |       |
|                  |                   |                   |                    |                                    | 14.84       |       |
|                  |                   |                   |                    |                                    | 7.03        |       |
|                  |                   |                   |                    |                                    | 11.01       |       |
|                  |                   |                   |                    |                                    | 12.78       |       |
|                  |                   |                   |                    | S2                                 | 0.75        |       |
|                  |                   |                   |                    |                                    | 1.04        |       |
|                  |                   |                   |                    |                                    | 0.59        |       |
|                  |                   |                   |                    |                                    | 0.75        |       |
|                  |                   |                   |                    |                                    | 0.59        |       |
|                  |                   |                   |                    |                                    | 0.55        |       |
|                  |                   |                   |                    |                                    | 0.59        |       |
|                  |                   |                   |                    |                                    | 1.09        |       |
|                  |                   |                   |                    |                                    | 0.90        |       |
|                  |                   |                   |                    |                                    | 7.80        |       |

| Waterbody Type | Study | Region | Sites              | Sub-sites | AVS umole/g | Means |
|----------------|-------|--------|--------------------|-----------|-------------|-------|
|                |       |        |                    |           | 6.96        |       |
|                |       |        |                    | S3        | 0.39        |       |
|                |       |        |                    |           | 0.44        |       |
|                |       |        |                    |           | 0.44        |       |
|                |       |        |                    |           | 0.54        |       |
|                |       |        |                    |           | 1.67        |       |
|                |       |        |                    |           | 1.53        |       |
|                |       |        |                    |           | 1.50        |       |
|                |       |        |                    |           | 0.74        |       |
|                |       |        |                    |           | 2.69        |       |
|                |       |        |                    |           | 2.35        |       |
|                |       |        |                    |           | 1.67        |       |
|                |       |        |                    | S4        | 0.25        |       |
|                |       |        |                    |           | 0.25        |       |
|                |       |        |                    |           | 1.13        |       |
|                |       |        |                    |           | 0.86        |       |
|                |       |        |                    |           | 0.50        |       |
|                |       |        |                    |           | 0.64        |       |
|                |       |        |                    |           | 5.79        |       |
|                |       |        |                    |           | 6.11        |       |
|                |       |        |                    |           | 9.04        |       |
|                |       |        |                    |           | 5.16        |       |
|                |       |        |                    |           | 8.18        |       |
|                |       |        |                    | S7        | 1.09        |       |
|                |       |        |                    |           | 1.32        |       |
|                |       |        |                    |           | 4.60        |       |
|                |       |        |                    |           | 6.30        |       |
|                |       |        |                    |           | 9.41        |       |
|                |       |        |                    |           | 9.70        |       |
|                |       |        |                    |           | 10.11       |       |
|                |       |        |                    |           | 8.59        |       |
|                |       |        |                    |           | 12.23       |       |
|                |       |        |                    |           | 9.39        |       |
|                |       |        |                    |           | 7.52        |       |
|                |       |        | Pearl River Winter | S1        | 1.00        | 2.65  |
|                |       |        |                    |           | 0.54        |       |
|                |       |        |                    |           | 1.60        |       |
|                |       |        |                    |           | 1.36        |       |
|                |       |        |                    |           | 1.28        |       |
|                |       |        |                    |           | 1.03        |       |
|                |       |        |                    |           | 1.24        |       |
|                |       |        |                    |           | 2.60        |       |

| Waterbody Type | Study | Region | Sites | Sub-sites | AVS umole/g | Means |
|----------------|-------|--------|-------|-----------|-------------|-------|
|                |       |        |       |           | 1.97        |       |
|                |       |        |       |           | 3.53        |       |
|                |       |        |       |           | 1.98        |       |
|                |       |        |       |           | 0.82        |       |
|                |       |        |       | S2        | 1.52        |       |
|                |       |        |       |           | 2.32        |       |
|                |       |        |       |           | 4.54        |       |
|                |       |        |       |           | 5.73        |       |
|                |       |        |       |           | 6.16        |       |
|                |       |        |       |           | 4.36        |       |
|                |       |        |       |           | 5.66        |       |
|                |       |        |       |           | 6.14        |       |
|                |       |        |       |           | 6.14        |       |
|                |       |        |       |           | 8.80        |       |
|                |       |        |       |           | 4.86        |       |
|                |       |        |       |           | 7.14        |       |
|                |       |        |       | S3        | 0.78        |       |
|                |       |        |       |           | 1.12        |       |
|                |       |        |       |           | 0.45        |       |
|                |       |        |       |           | 1.46        |       |
|                |       |        |       |           | 0.86        |       |
|                |       |        |       |           | 1.47        |       |
|                |       |        |       |           | 1.11        |       |
|                |       |        |       |           | 1.13        |       |
|                |       |        |       |           | 0.69        |       |
|                |       |        |       |           | 0.52        |       |
|                |       |        |       |           | 0.77        |       |
|                |       |        |       | S6        | <0.01       |       |
|                |       |        |       |           | <0.01       |       |
|                |       |        |       |           | <0.01       |       |
|                |       |        |       |           | <0.01       |       |
|                |       |        |       |           | 3.33        |       |
|                |       |        |       |           | 1.80        |       |
|                |       |        |       |           | 2.31        |       |
|                |       |        |       |           | <0.01       |       |
|                |       |        |       |           | 3.08        |       |
|                |       |        |       |           | 12.83       |       |
|                |       |        |       |           | 11.26       |       |
|                |       |        |       | S7        | <0.01       |       |
|                |       |        |       |           | 0.80        |       |
|                |       |        |       |           | 1.30        |       |
|                |       |        |       |           | 1.49        |       |

| Waterbody Type   | Study                 | Region                        | Sites           | Sub-sites | AVS umole/g | Means |      |      |      |
|------------------|-----------------------|-------------------------------|-----------------|-----------|-------------|-------|------|------|------|
|                  |                       |                               |                 |           | 1.37        |       |      |      |      |
|                  |                       |                               |                 |           | 0.53        |       |      |      |      |
|                  |                       |                               |                 |           | 2.34        |       |      |      |      |
|                  |                       |                               |                 |           | 6.50        |       |      |      |      |
|                  |                       |                               |                 |           | 3.25        |       |      |      |      |
|                  |                       |                               |                 |           | 2.34        |       |      |      |      |
|                  |                       |                               |                 |           | 3.76        |       |      |      |      |
|                  |                       |                               |                 |           | 4.19        |       |      |      |      |
|                  |                       |                               |                 |           | 4.75        |       |      |      |      |
|                  |                       |                               |                 |           | 80.8        |       |      |      |      |
| Estuarine/Marine | Younis et al (2014)   | N Egypt Coast                 | Maryut Lagoon   | Min       | 4.75        | 21.9  |      |      |      |
|                  |                       |                               |                 | Max       | 80.8        |       |      |      |      |
|                  |                       |                               | Burullus Lagoon | Min       | 1.5         | 4.91  |      |      |      |
|                  |                       |                               |                 | Max       | 15.5        |       |      |      |      |
|                  |                       |                               | Manzalah Lagoon | Min       | 7.95        | 26.1  |      |      |      |
|                  |                       |                               |                 | Max       | 89.4        |       |      |      |      |
| Estuarine/Marine | Yu et al (2001)       | W Taiwan Coast                | EII-Ren River   | A         | 42.82       | 29.79 |      |      |      |
|                  |                       |                               |                 |           | 43.86       |       |      |      |      |
|                  |                       |                               |                 |           | 43.02       |       |      |      |      |
|                  |                       |                               |                 |           | 31.78       |       |      |      |      |
|                  |                       |                               |                 |           | 28.59       |       |      |      |      |
|                  |                       |                               |                 |           | 20.32       |       |      |      |      |
|                  |                       |                               |                 |           | 14.71       |       |      |      |      |
|                  |                       |                               |                 |           | 22.17       |       |      |      |      |
|                  |                       |                               |                 |           | 25.86       |       |      |      |      |
|                  |                       |                               |                 |           | 24.78       |       |      |      |      |
|                  |                       |                               |                 |           | B           |       | 2.42 | 6.41 |      |
|                  |                       |                               |                 |           |             |       | 2.48 |      |      |
|                  |                       |                               |                 |           |             |       | 2.09 |      |      |
|                  |                       |                               |                 |           |             |       | 2.73 |      |      |
|                  |                       |                               |                 |           |             |       |      |      | 2.87 |
|                  |                       |                               |                 |           |             |       |      |      | 3.57 |
|                  |                       |                               |                 |           |             |       |      |      | 5.04 |
|                  |                       |                               |                 |           |             |       |      |      | 7.46 |
| 18.43            |                       |                               |                 |           |             |       |      |      |      |
| 16.99            |                       |                               |                 |           |             |       |      |      |      |
| Estuarine/Marine | Zhuang and Gao (2013) | NE China Coast<br>Laizhou Bay | Summer R        | Min.      | 0.25        | 26.96 |      |      |      |
|                  |                       |                               |                 | Max.      | 182.73      |       |      |      |      |
|                  |                       |                               | Summer Sea      | Min.      | 0.86        | 4.98  |      |      |      |
|                  |                       |                               |                 | Max.      | 20.51       |       |      |      |      |
|                  |                       |                               | Autumn R        | Min.      | 0.93        | 21.83 |      |      |      |
|                  |                       |                               |                 | Max.      | 167.05      |       |      |      |      |
|                  |                       |                               | Autumn Sea      | Min.      | 0.70        | 3.61  |      |      |      |
|                  |                       |                               |                 | Max.      | 10.00       |       |      |      |      |
